# Supplementary material for: para metallation of 3-acetyl-chromen-2-one Schiff bases in tetranuclear palladacycles: focus on their biomolecular interaction and in vitro cytotoxicity
Source: Royal Society of Chemistry journal article supplement (doi:10.1039/c9dt02663k), 2019-01-01
Supplement: c9dt02663k1.pdf [file c9dt02663k1.pdf]

## Para metallation of 3-acetyl-chromen-2-one Schiff bases in tetranuclear palladacycles: Focus on their biomolecular interaction and *in vitro* cytotoxicity

G. Kalaiarasi,<sup>a</sup> S. Dharani,<sup>a</sup> V. M. Lynch<sup>b</sup> and R. Prabhakaran<sup>a\*</sup>

<sup>a</sup>Department of Chemistry, Bharathiar University, Coimbatore, 641 046, India.

<sup>b</sup>Department of Chemistry, University of Texas, Austin, TX 78712-1224, USA.

\*Corresponding author e-mail: [rpnchemist@gmail.com](mailto:rpnchemist@gmail.com) (R. Prabhakaran)

### SUPPORTING INFORMATION

#### Materials and methods

Ethidium bromide (EB), Serum albumins (BSA/HSA), Calf Thymus DNA (CT-DNA) were purchased from HiMedia and used as received. Melting points were measured in a Lab India apparatus. Infrared (IR) spectra were measured on a JASCO FT-IR 4100 instrument as KBr pellets between 400–4000 cm<sup>-1</sup>. The electronic spectra of the compounds were recorded in dichloromethane using a Spectrophotometer (JASCO V-630) in the 200–800 nm range. Emission spectra were recorded by using JASCO FP 6600 Spectrofluorimeter. <sup>1</sup>H NMR spectra were recorded in DMSO at room temperature with a Bruker 400 MHz instrument chemical shift relative to tetramethylsilane (TMS).

#### X-ray Crystallography

##### Hydrogen bonding in complexes 1–4

In the tetrameric crystal structure of **1**, each monomeric unit showed three hydrogen bonds: The hydrogen atom of H(3A) of amino group N(3)–H(3A) is engaged in intermolecular hydrogen bonding with oxygen atom O(1B) of the DMF molecule, which came from solvent of crystallisation (O(1B)–N(3A)=3.15(4)). The hydrogen atom H(3B) of amino group N(3)–H(3B) is involved in intermolecular hydrogen bonding with ring carbonyl oxygen atom O(2) of a second molecule and the ring carbonyl oxygen atom O(2) of the first molecule involved in hydrogen bond with hydrogen atom H(3B) of the amino group of the another molecule. This intermolecular hydrogen bonding leads to an unremitting 3D chain formation (Fig. S13) at four ends of the tetramer with a distance of 2.971(8) Å [O(2)–N(3)=2.971(8); N(3)–H(3B)⋯O(2) = 172.00(8)°] (Table S3).

In complex **2**, the molecular packing suggests that the stabilization of the lattice may be due to eight intermolecular hydrogen bonds, each monomeric unit involving the two hydrogen bonds: one hydrogen bond between the ring carbonyl oxygen atom O(2) of the first molecule and hydrogen (H3) atom of the terminal N(3)–H(3) group of the second molecule and second hydrogen bond involves the hydrogen (H3) atom of the terminal N(3)–H(3) group of the first molecule and ring carbonyl oxygen atom O(2) of the another molecule (N(3)–O(2), O(2)–N(3) is 2.895 Å). All the eight intermolecular hydrogen bondings led to give a 3D layer structure to the complex **2** (Fig. S14).

The presence of four intermolecular hydrogen bondings in complex **3** creates a 2D network (Fig. S15; Table S3). In tetrameric unit of complex **3**, one of the monomeric unit involved in intermolecular hydrogen bonding with carbonyl oxygen atom O(2) and the hydrogen atom H(12) of terminal N(12)–H(12) group of second molecule and the hydrogen atom H(12) of terminal N(12)–H(12) group in same monomeric unit engaged in intermolecular hydrogen bonding with carbonyl atom O(2) of the another molecule. The hydrogen atom H(12) of terminal N(12)–H(12) group in second monomeric unit is involved in intermolecular hydrogen bonding with carbonyl oxygen atom O(2) of a second molecule. Third monomeric unit involving the hydrogen bond between the ring carbonyl oxygen atom O(2) and hydrogen (H3) atom of the terminal N(3)–H(3) group of the second molecule. In complex **4**, an intermolecular hydrogen bonding was found between the terminal nitrogen and the oxygen atom of the DMF [N(3)...O(3) (2.858 Å); N(3)–H(3)···O(3)=174.56 °] which came through the solvent of crystallization (Fig. S16; Table S3).

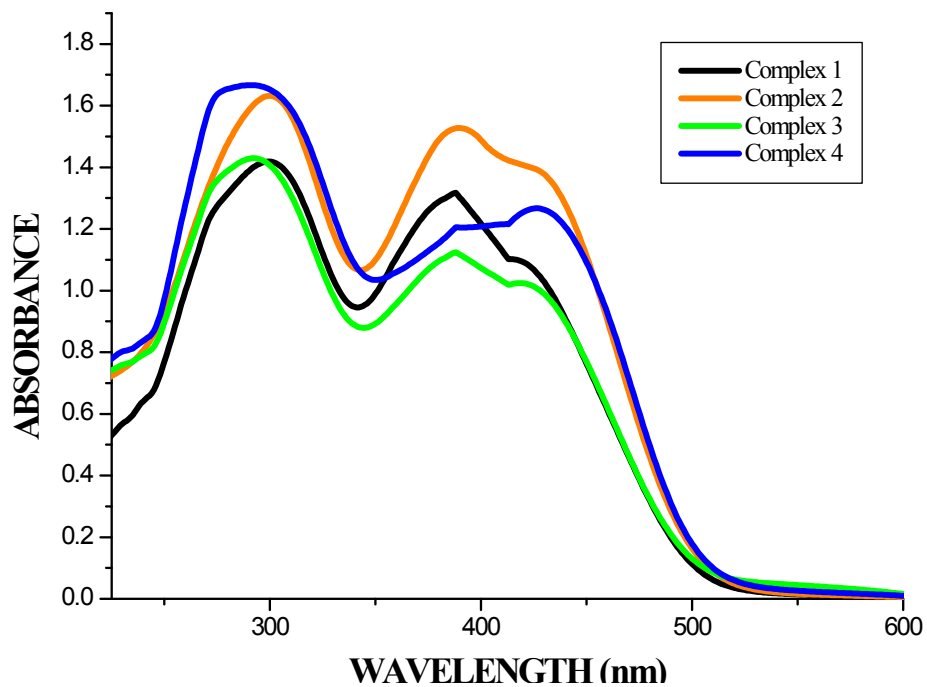

Fig. S1 UV-Vis spectra of the complexes 1-4

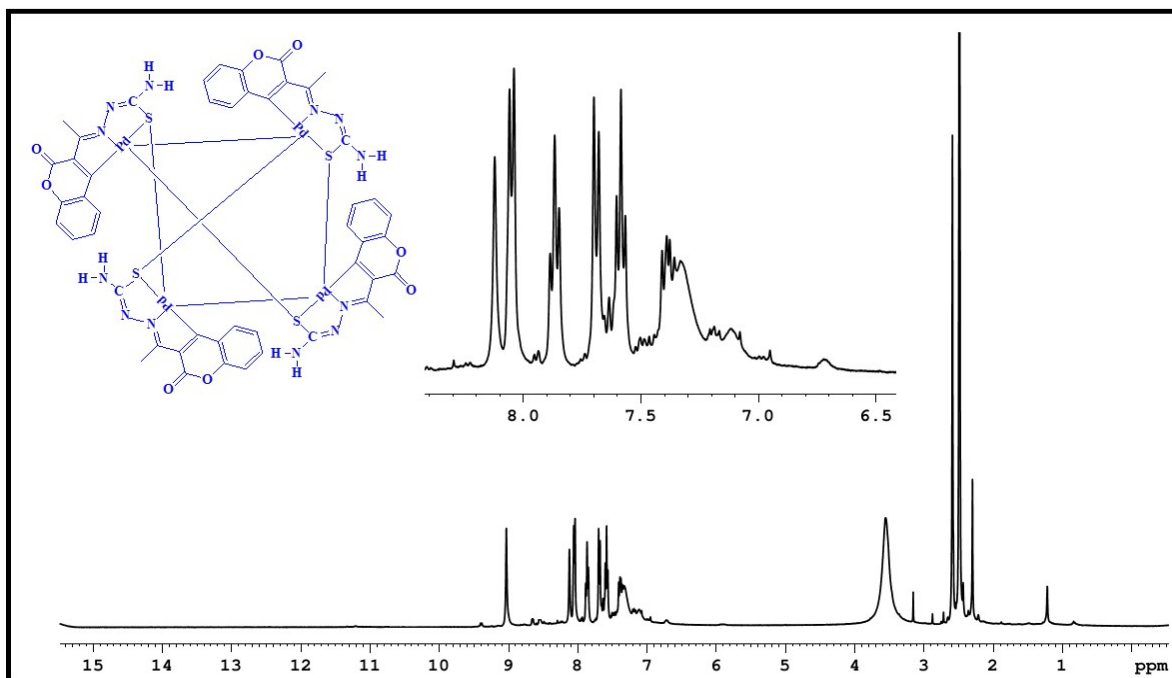

Fig. S2 <sup>1</sup>H-NMR spectrum of [Pd(3MAC-tsc)<sub>4</sub>] (1)

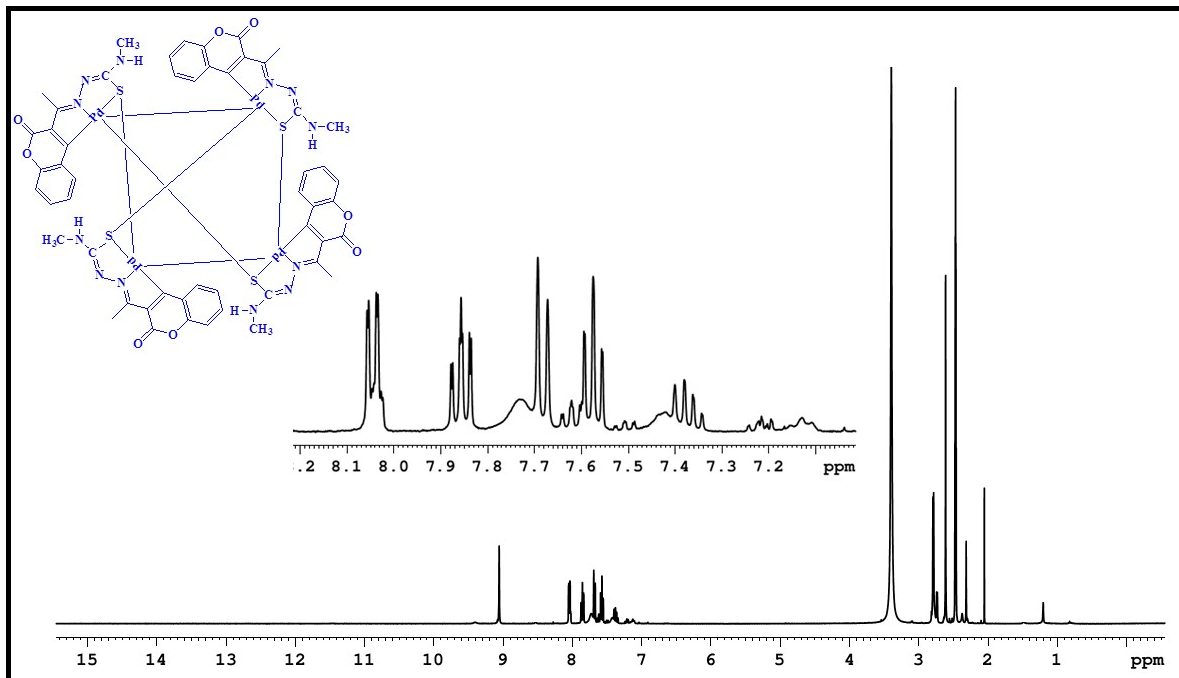

Fig. S3 <sup>1</sup>H-NMR spectrum of [Pd(3MAC-mtsc)<sub>4</sub>] (2)

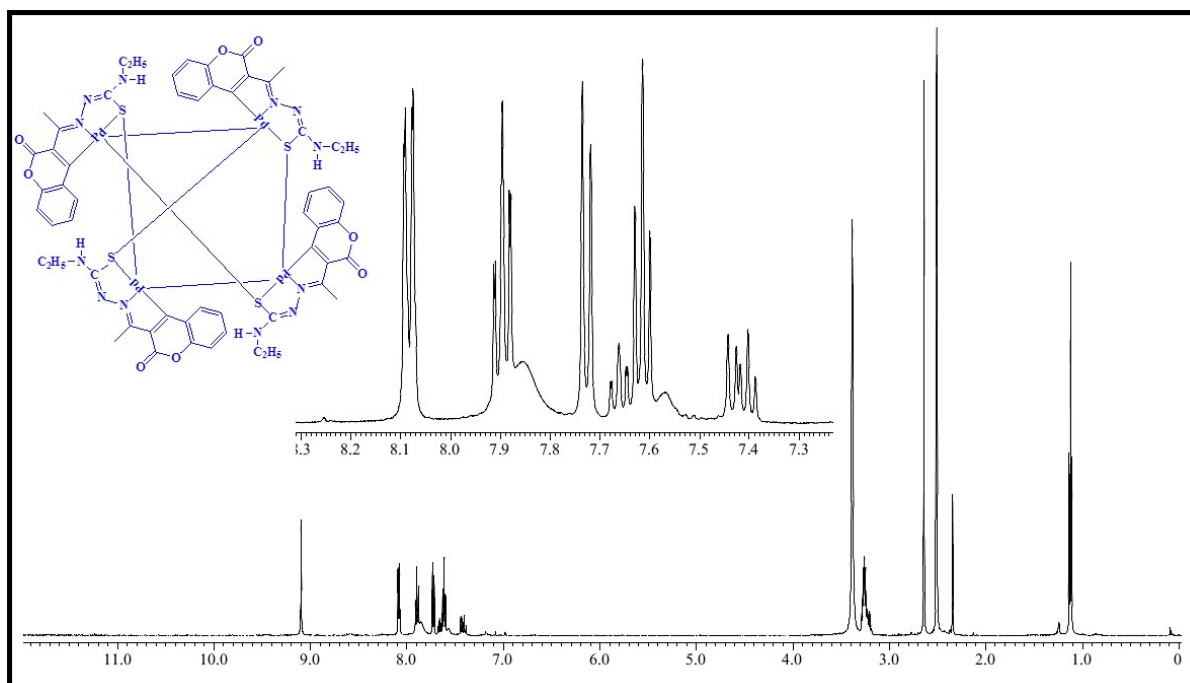

Fig. S4 <sup>1</sup>H-NMR spectrum of [Pd(3MAC-etsc)<sub>4</sub>] (3)

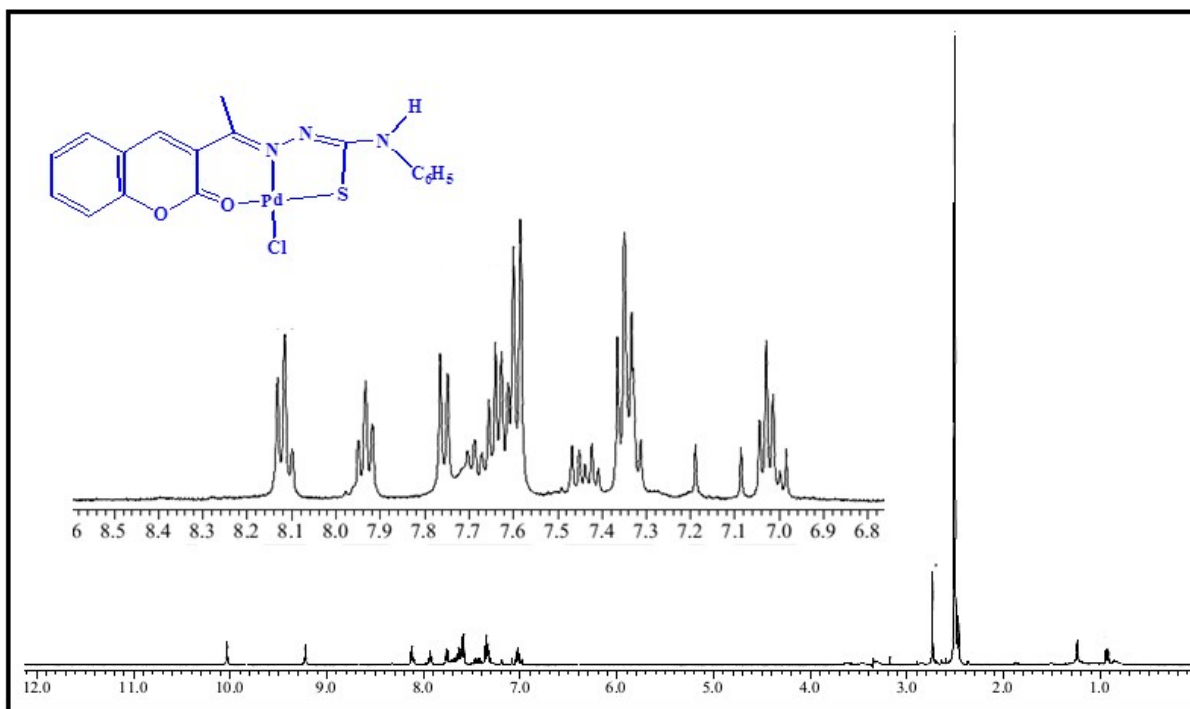

Fig. S5 <sup>1</sup>H-NMR spectrum of [Pd(H-3MAC-ptsc)Cl] (4)

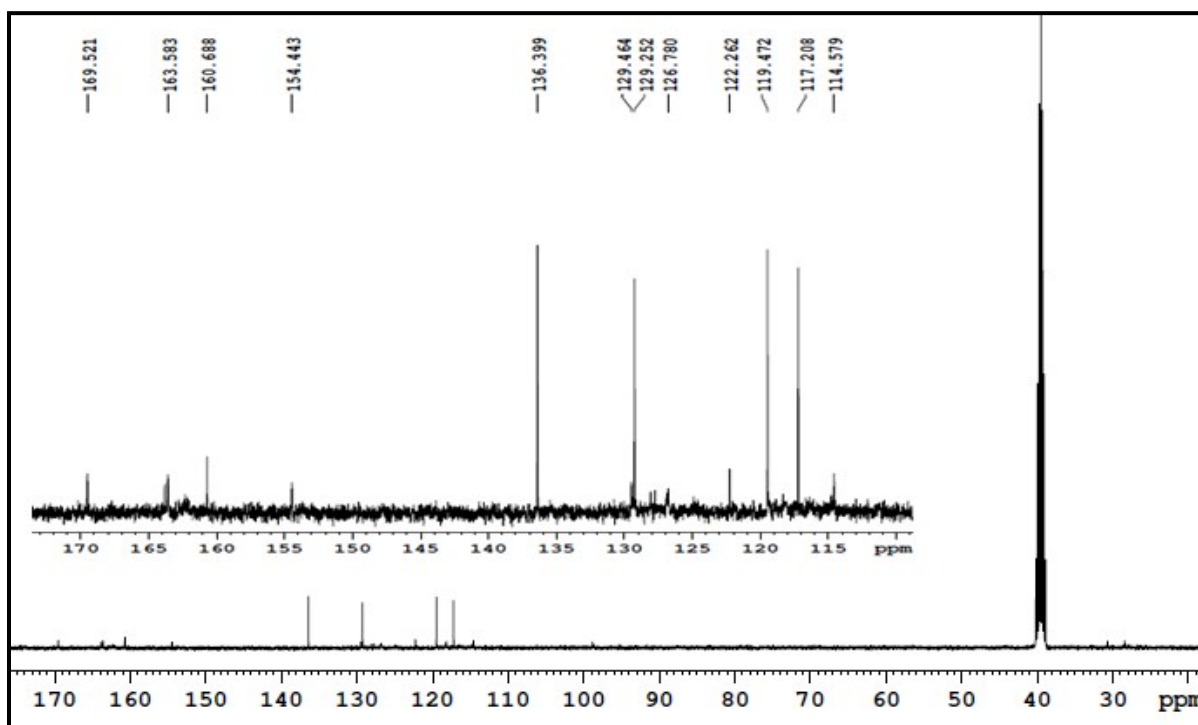

Fig. S6 <sup>13</sup>C-NMR spectrum of [{Pd(3MAC-tsc)}<sub>4</sub>] (1)

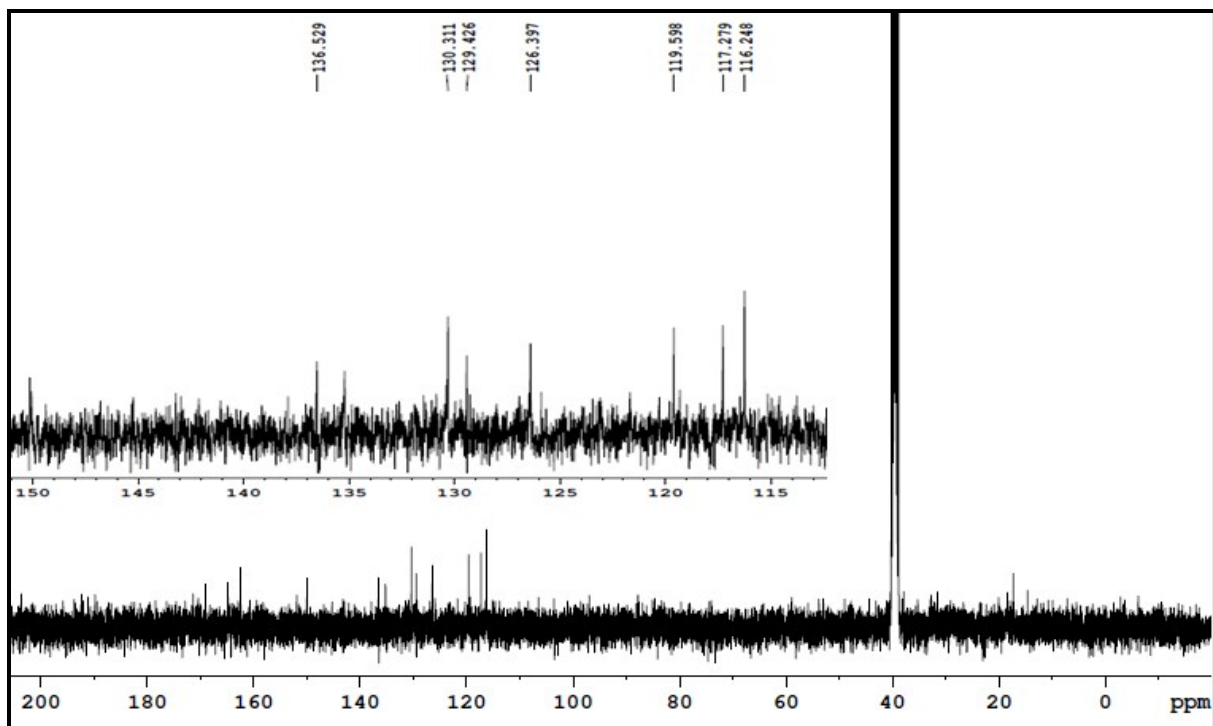

Fig. S7 <sup>13</sup>C-NMR spectrum of [Pd(3MAC-mtsc)<sub>4</sub>] (2)

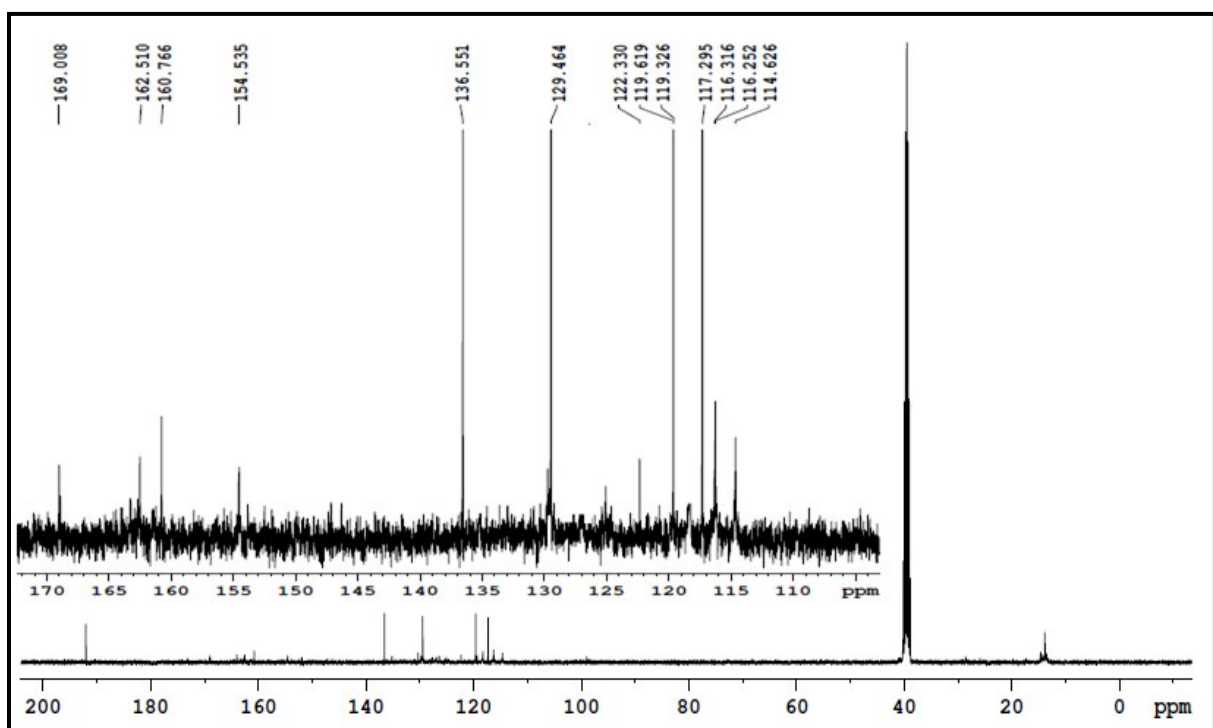

Fig. S8 <sup>13</sup>C-NMR spectrum of [Pd(3MAC-etsc)<sub>4</sub>] (3)

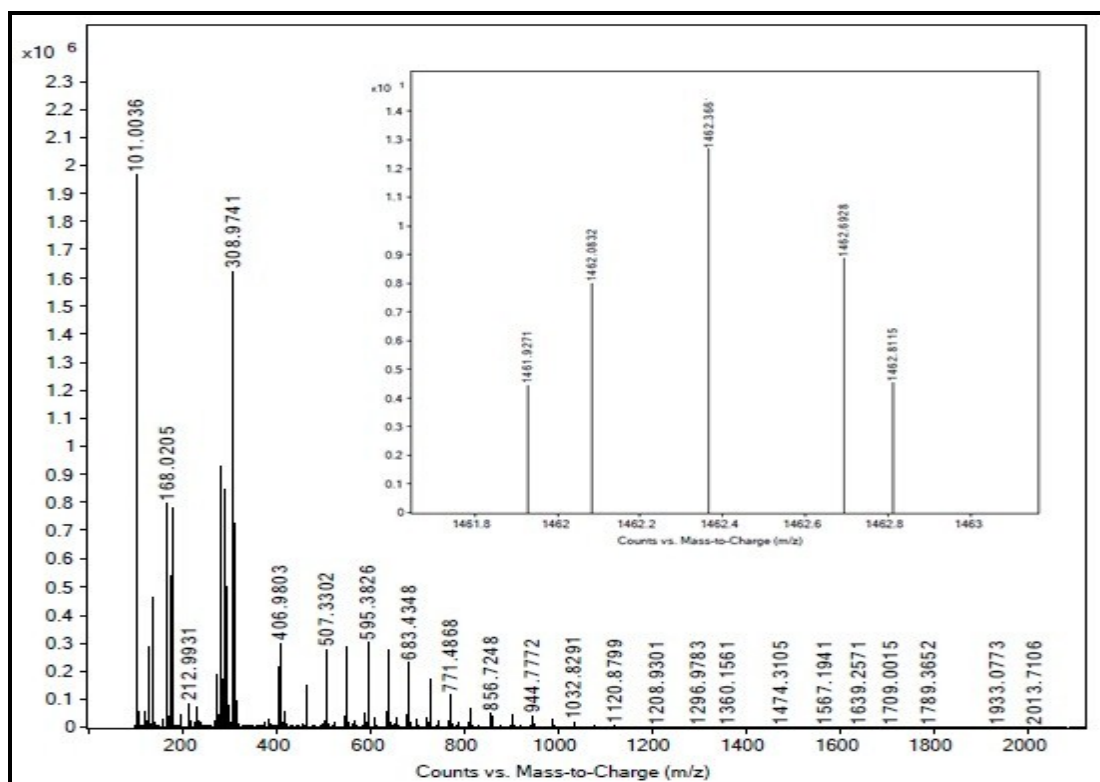

Fig. S9 ESI-MS of complex 1 [ $\text{Pd}(\text{3MAC-tsc})_4$ ]

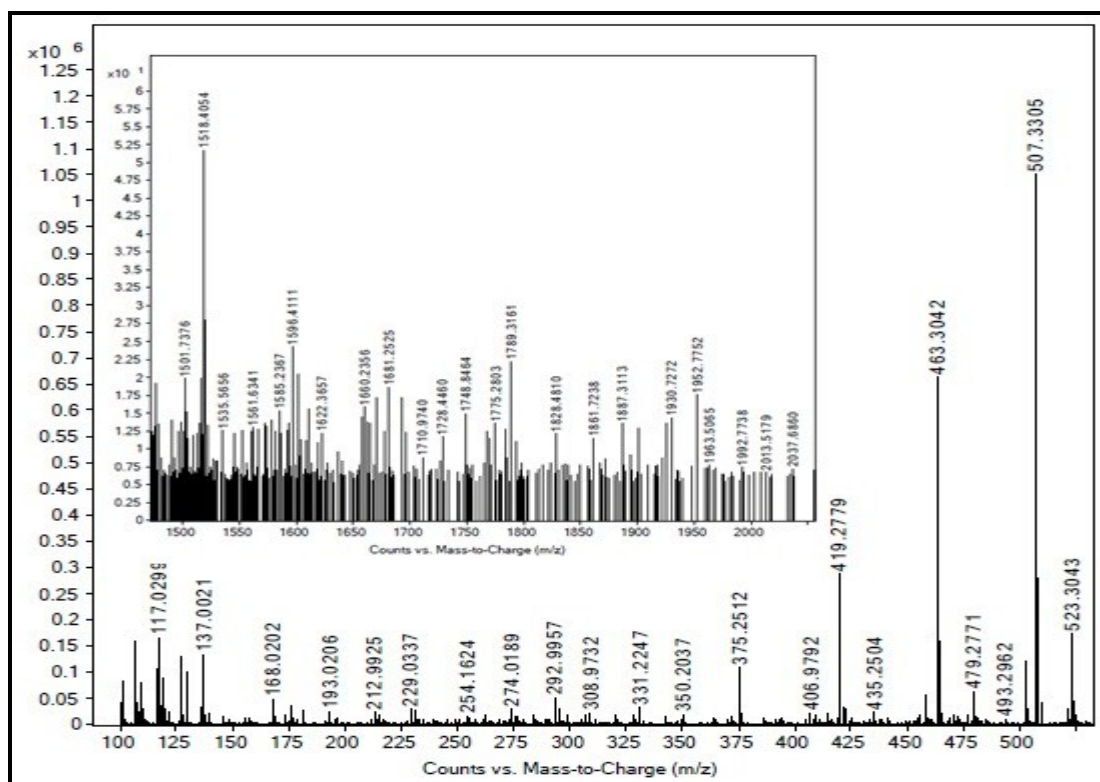

Fig. S10 ESI-MS of complex 2 [ $\text{Pd}(\text{3MAC-mtsc})_4$ ]

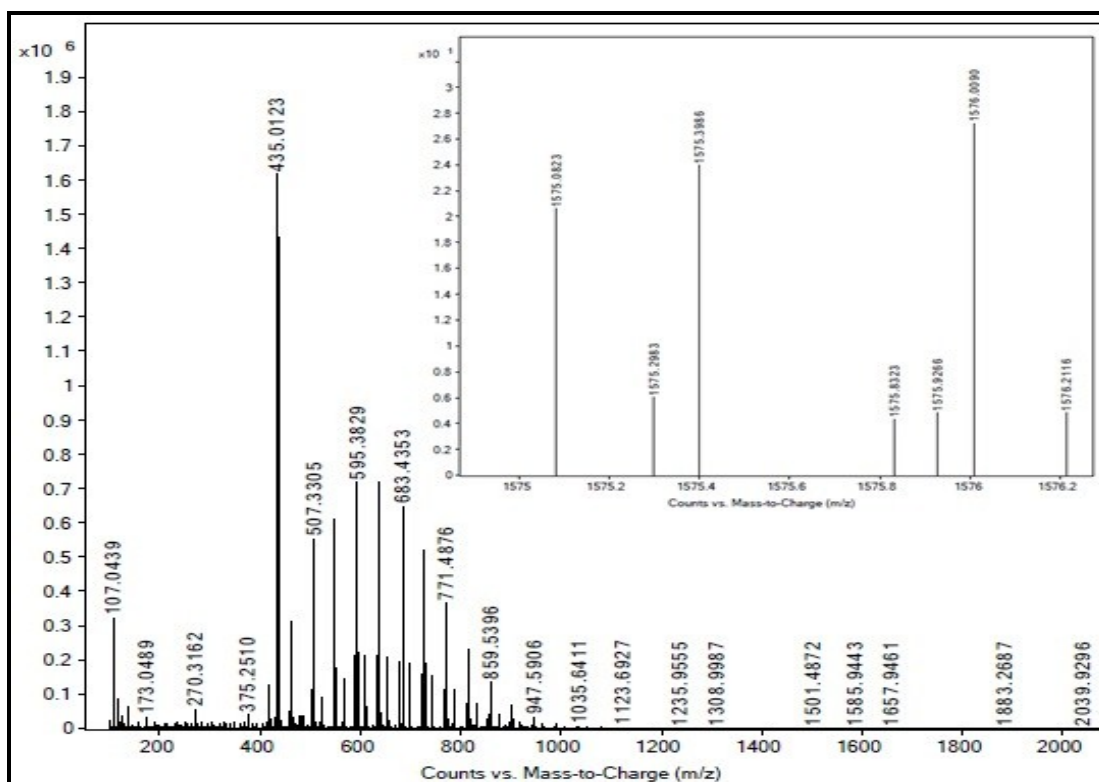

Fig. S11 ESI-MS of complex 3  $[\{Pd(3MAC-etsc)\}_4]$

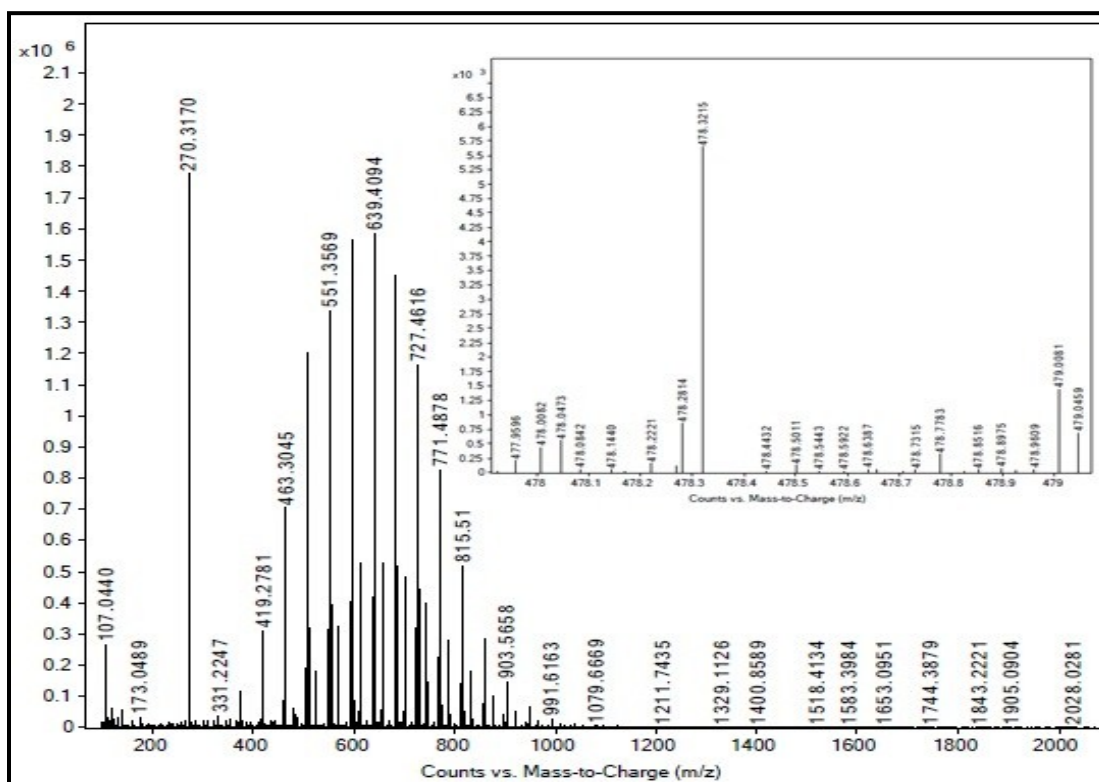

Fig. S12 ESI-MS of complex 4  $[Pd(H-3MAC-ptsc)Cl]$



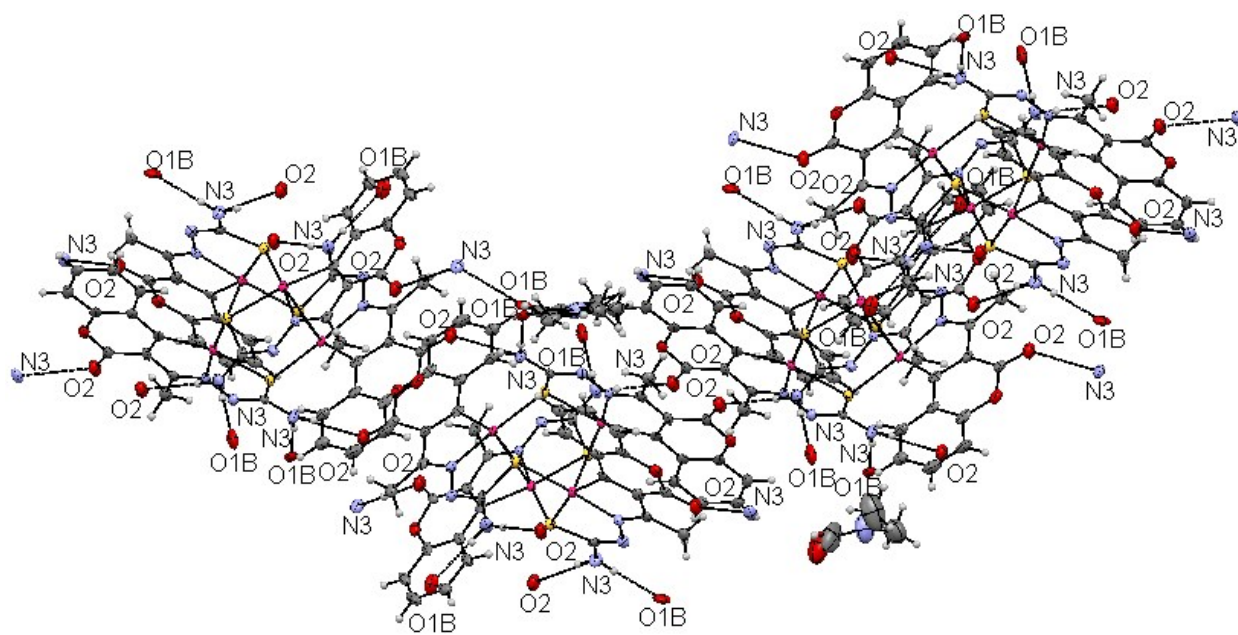

**Fig. S13** ORTEP diagram of the complex  $[\{\text{Pd}(\text{3MAC-tsc})\}_4]$  (**1**) with hydrogen bonding

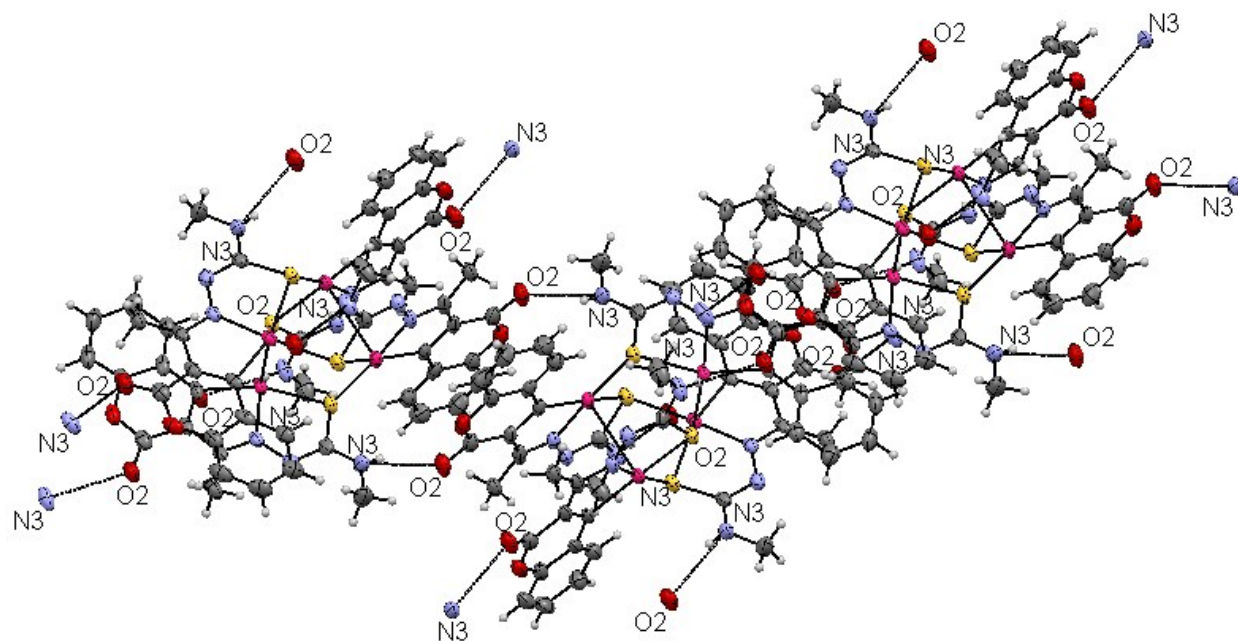

**Fig. S14** ORTEP diagram of the complex  $[\{\text{Pd}(\text{3MAC-mtsc})\}_4]$  (**2**) with hydrogen bonding

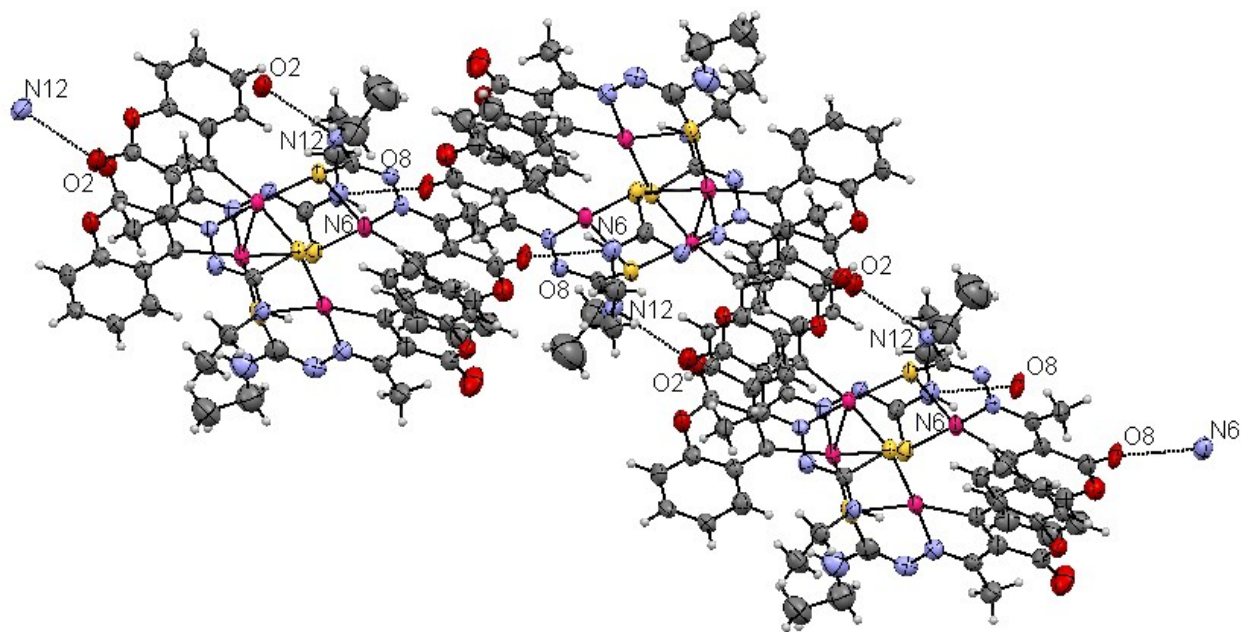

**Fig. S15** ORTEP diagram of the complex  $[\{\text{Pd}(\text{3MAC-etsc})\}_4]$  (**3**) with hydrogen bonding

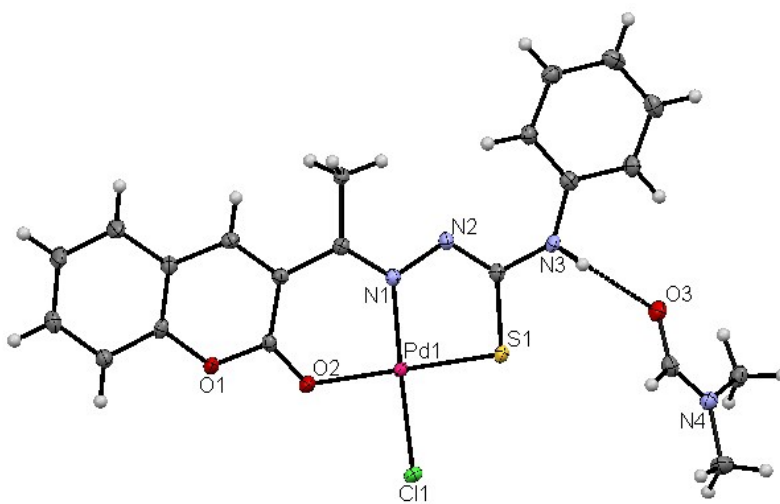

**Fig. S16** ORTEP diagram of the complex  $[\text{Pd}(\text{H-3MAC-ptsc})\text{Cl}]$  (**4**) with hydrogen bonding

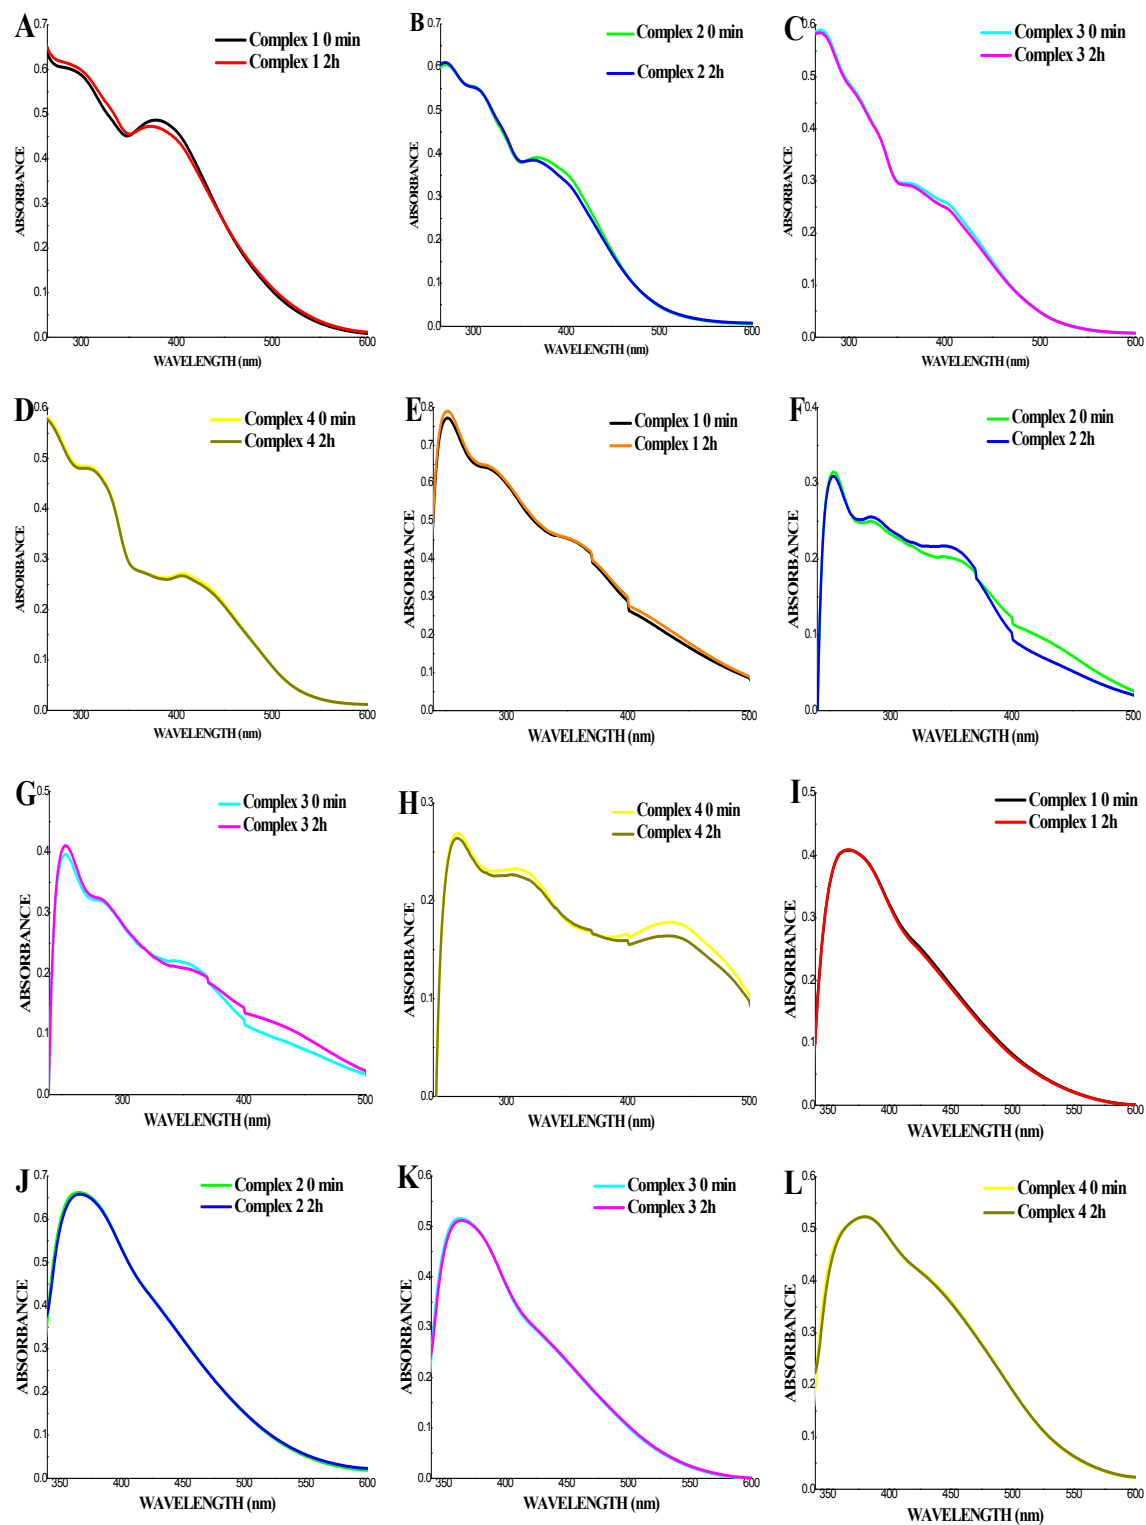

**Fig. S17** Stability studies of the complexes using UV-Vis absorption spectroscopic technique. A, B, C and D - absorption spectra of the complexes 1-4 in 99:1 H<sub>2</sub>O:DMSO; E, F, G and H - absorption spectra of the complexes 1-4 in 99:1 tris HCl:DMSO; I, J, K and L - absorption spectra of the complexes 1-4 in 99:1 phosphate buffer:DMSO

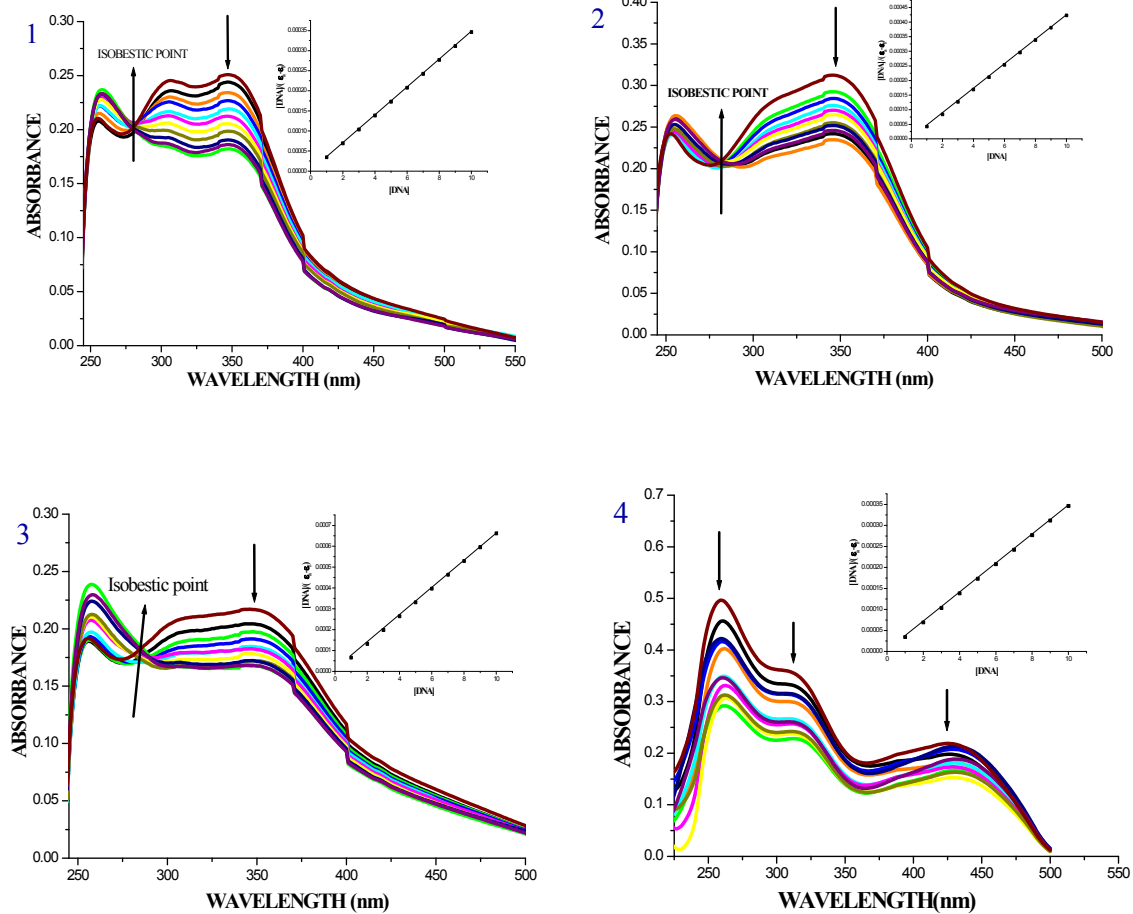

**Fig. S18** Absorption titration spectra of complexes (1-4) (10  $\mu$ M) with increasing concentrations (1-10  $\mu$ M) of CT-DNA (tris HCl buffer, pH 7.2). Inset: Binding isotherms of the complexes (1-4) with CT-DNA

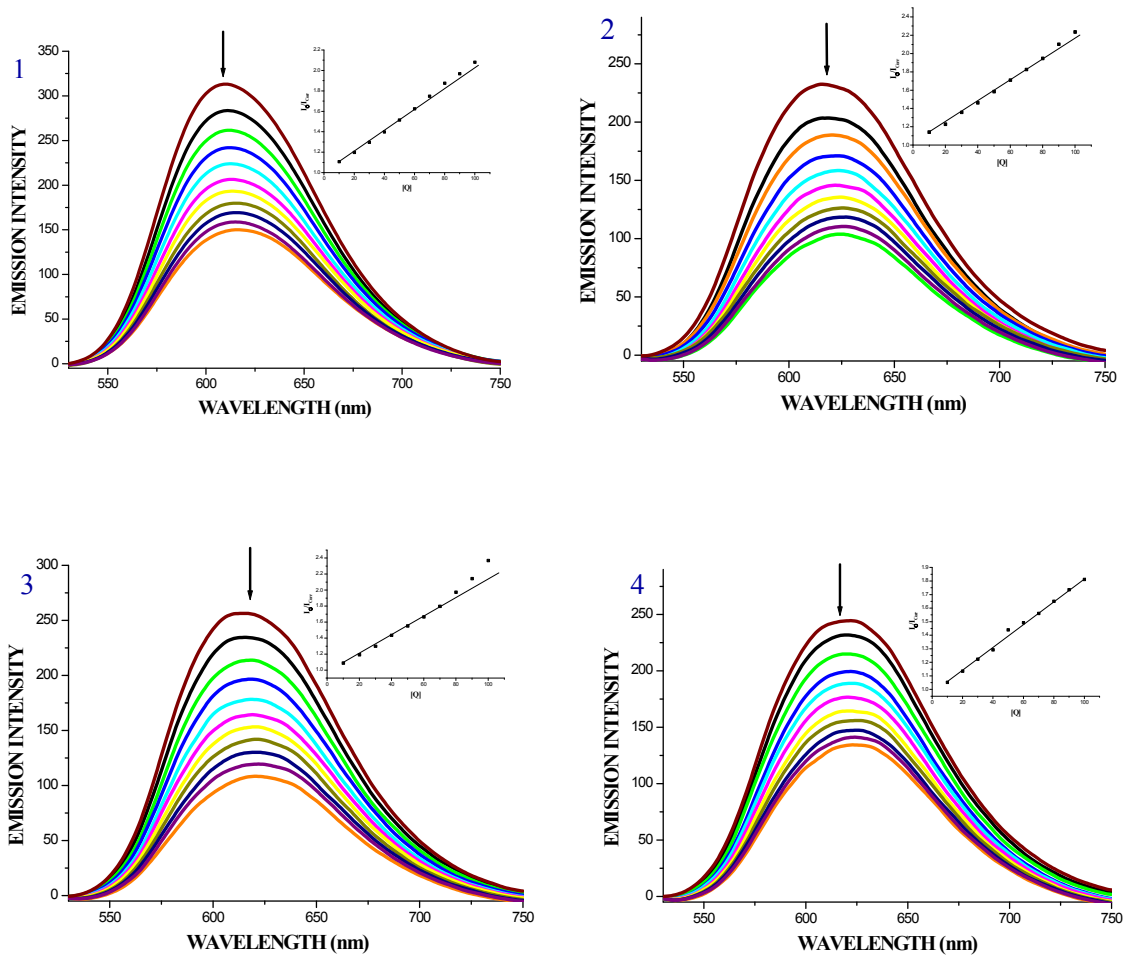

**Fig. S19** The emission spectra of the DNA-EB system ( $\lambda_{\text{exc}} = 515 \text{ nm}$ ,  $\lambda_{\text{emi}} = 530\text{--}750 \text{ nm}$ ), in the presence of complexes **1-4**. [DNA] = 10  $\mu\text{M}$ , [complex] = 10–100  $\mu\text{M}$ , [EB] = 10  $\mu\text{M}$ . The arrow shows the emission intensity changes upon increasing complex concentration. Inset: Stern-Volmer plot of the fluorescence titration of the complexes (**1-4**) (10–100  $\mu\text{M}$ ) with DNA-EB (10  $\mu\text{M}$ ).

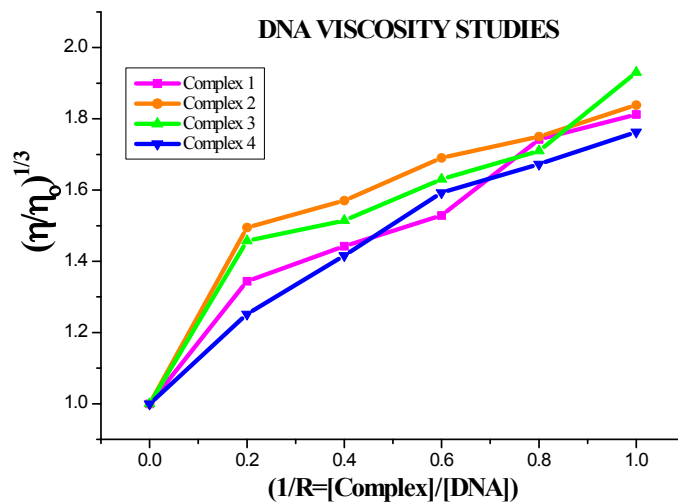

Fig. S20 Effect of the complexes (1-4) on the viscosity of CT-DNA

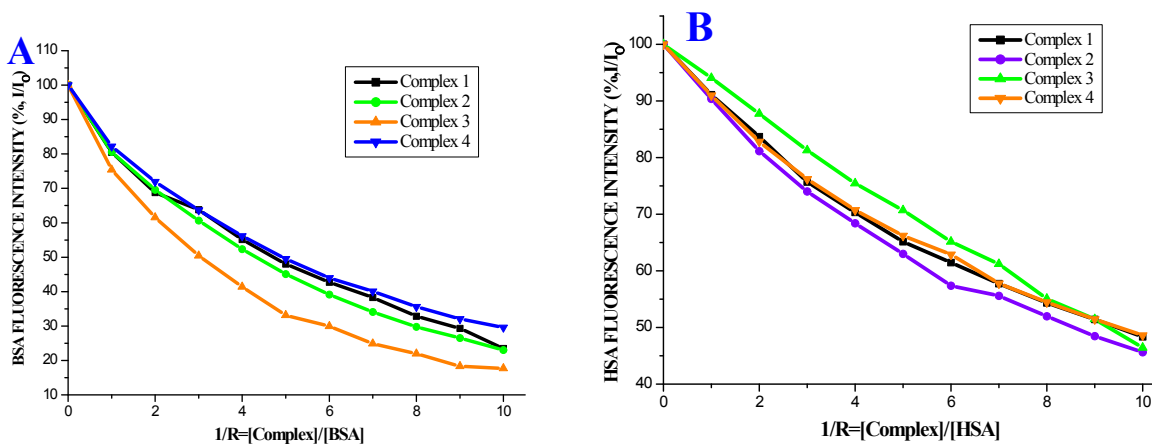

Fig. S21 A) Plot of % relative fluorescence intensity (%  $I/I_0$ ) vs  $r$  ( $1/R=[Complex]/[BSA]$ ) B) Plot of % relative fluorescence intensity (%  $I/I_0$ ) vs  $r$  ( $1/R=[Complex]/[HSA]$ )

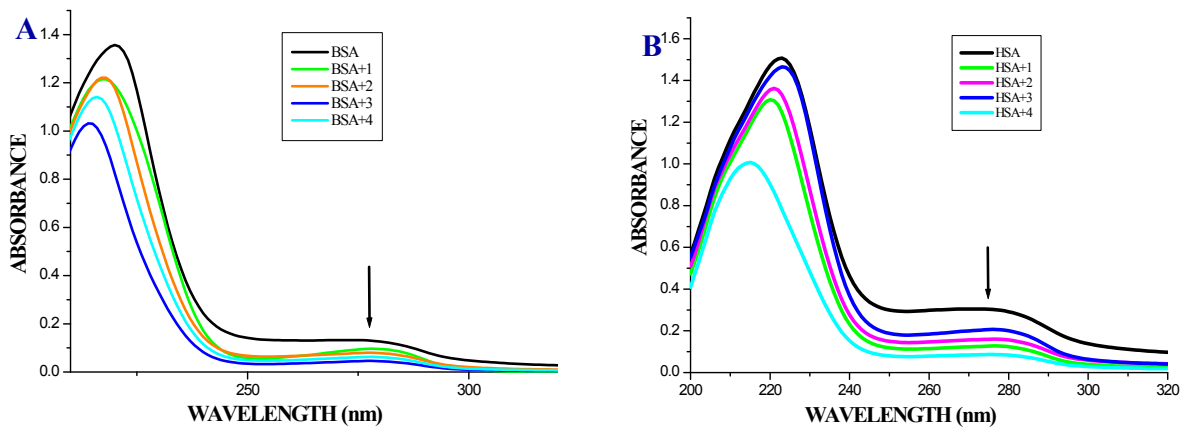

**Fig. S22** A) Absorption spectra in the absence and presence of complexes (1-4) with BSA ( $1 \times 10^{-5}$  M); B) Absorption spectra in the absence and presence of complexes (1-4) with HSA ( $1 \times 10^{-5}$  M)

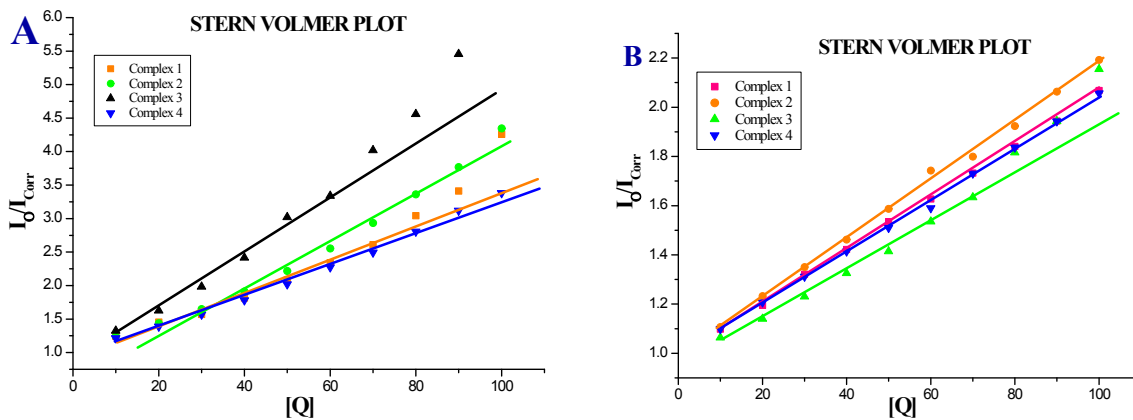

**Fig. S23** A) Stern-Volmer plot of the fluorescence titration of the complexes (1-4) (10-100  $\mu$ M) with BSA; B) Stern-Volmer plot of the fluorescence titration of the complexes (1-4) (10-100  $\mu$ M) with HSA

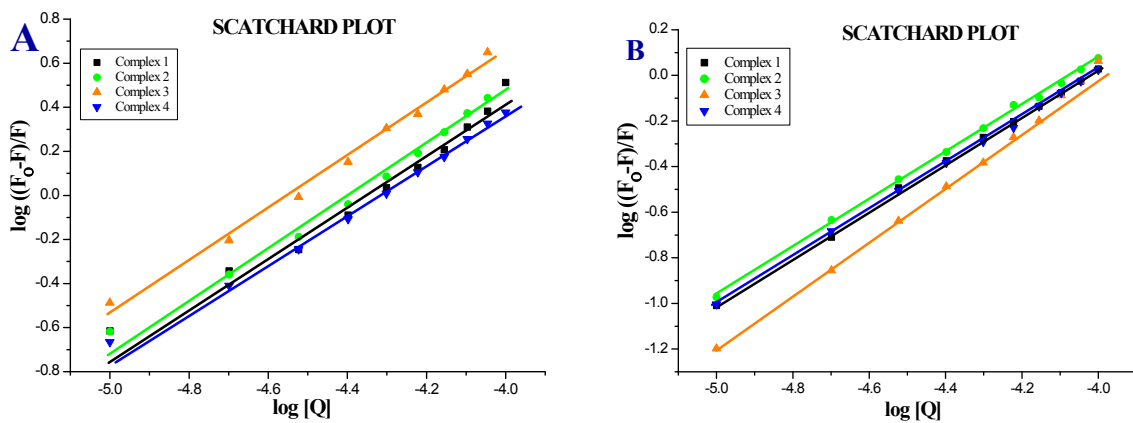

**Fig. S24 A)** Scatchard plot of the fluorescence titration of the complexes (**1-4**) (10-100  $\mu\text{M}$ ) with BSA (10  $\mu\text{M}$ ); **B)** Scatchard plot of the fluorescence titration of the complexes (**1-4**) (10-100  $\mu\text{M}$ ) with HSA (10  $\mu\text{M}$ )



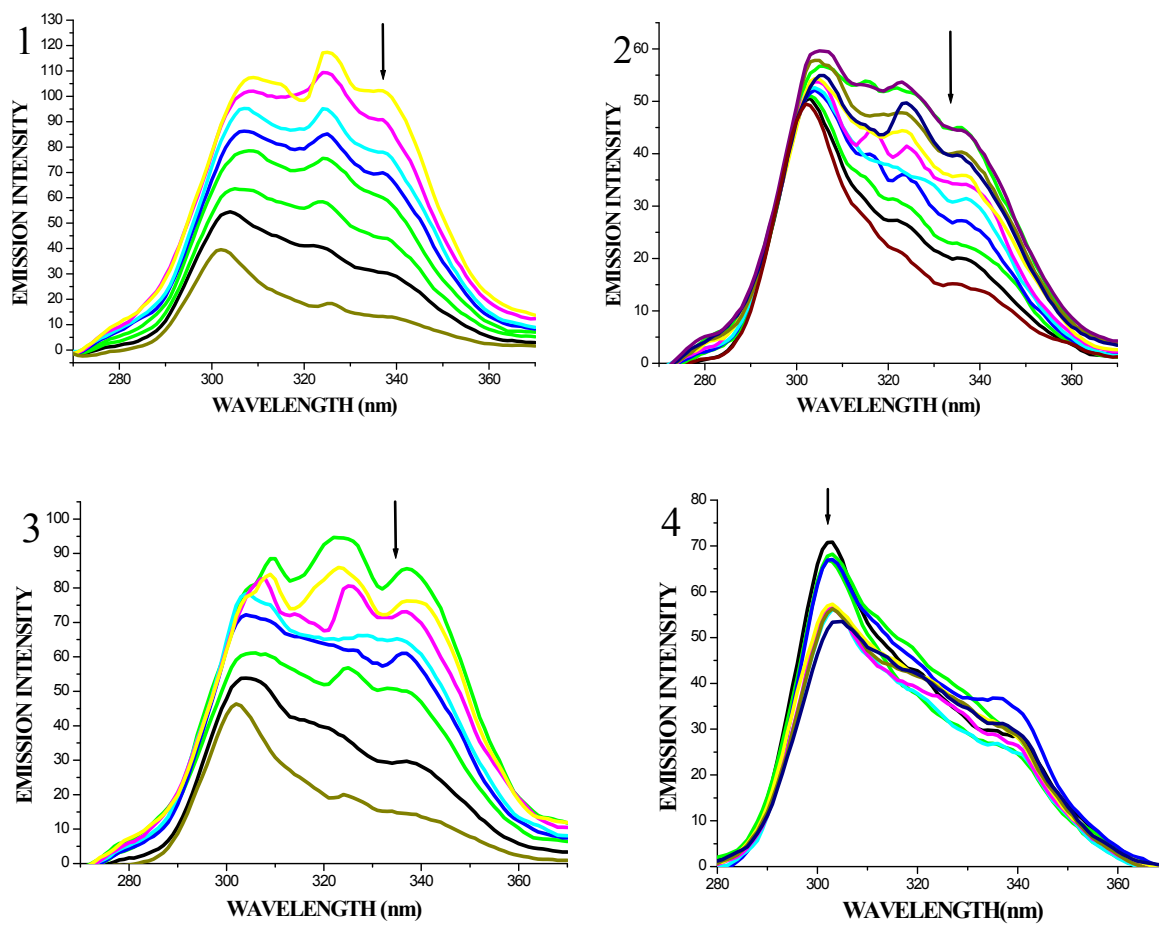

**Fig. S25** Synchronous spectra of BSA (10 μM) in the presence of increasing amounts of complexes 1-4 (10–100 μM) for a wavelength difference of  $\Delta\lambda= 15$  nm. The arrow shows the emission intensity changes upon increasing concentration of complexes.

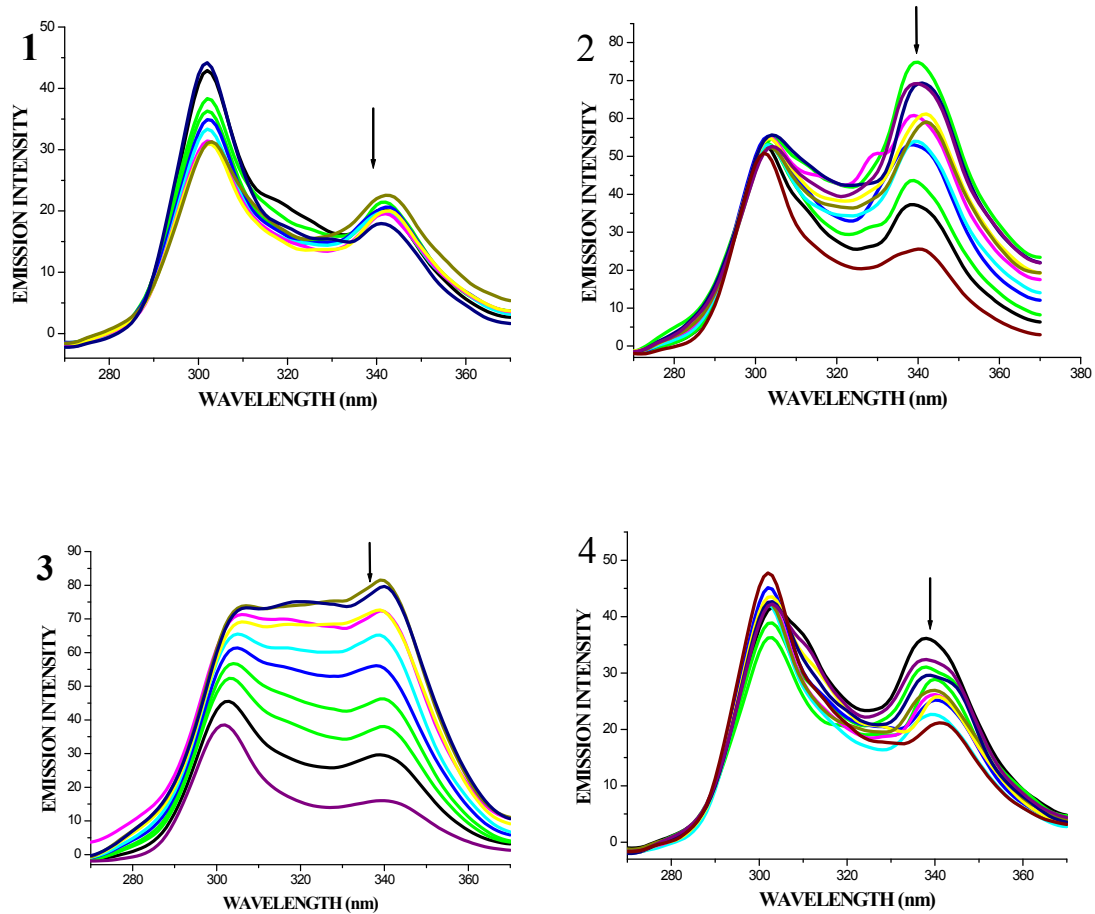

**Fig. S26** Synchronous spectra of HSA (10  $\mu\text{M}$ ) in the presence of increasing amounts of complexes **1-4** (10–100  $\mu\text{M}$ ) for a wavelength difference of  $\Delta\lambda=15$  nm. The arrow shows the emission intensity changes upon increasing concentration of complexes.

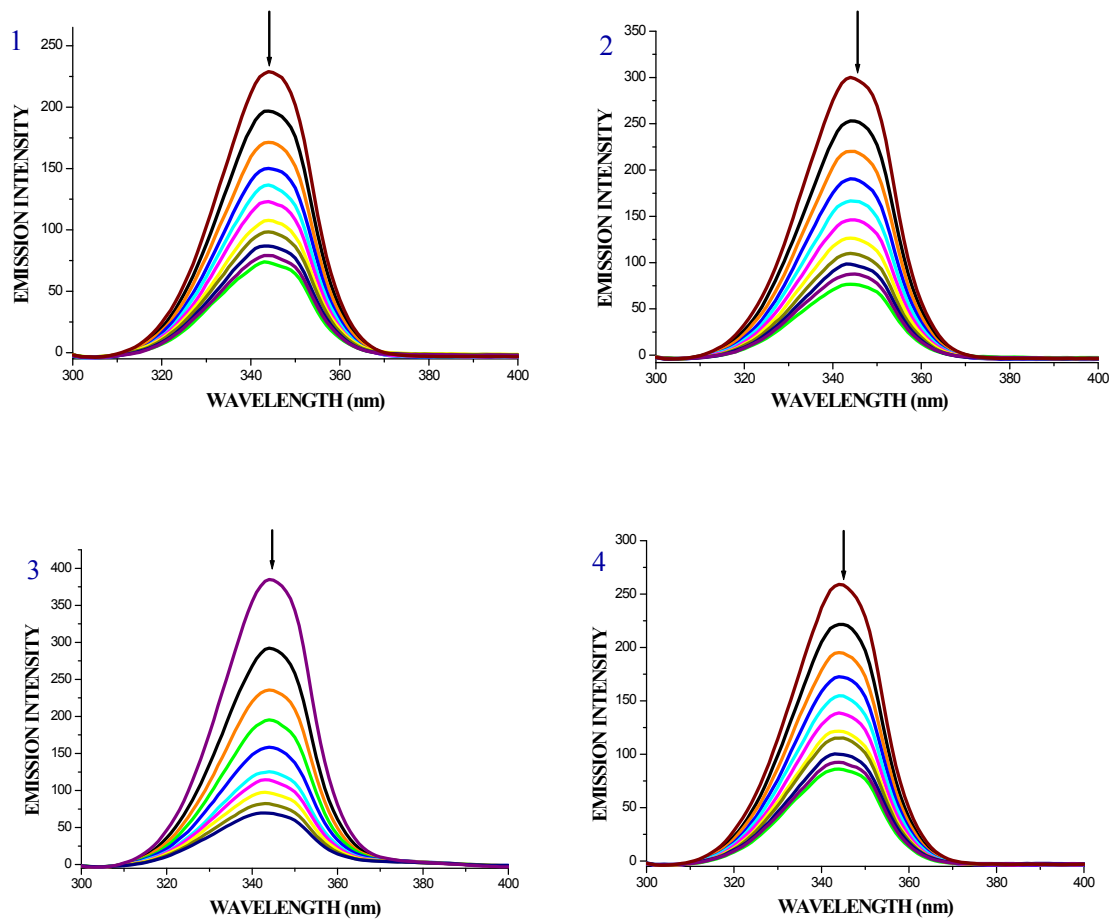

**Fig. S27** Synchronous spectra of BSA (10 μM) in the presence of increasing amounts of complexes **1-4** (10–100 μM) for a wavelength difference of  $\Delta\lambda= 60$  nm. The arrow shows the emission intensity changes upon increasing concentration of compounds.

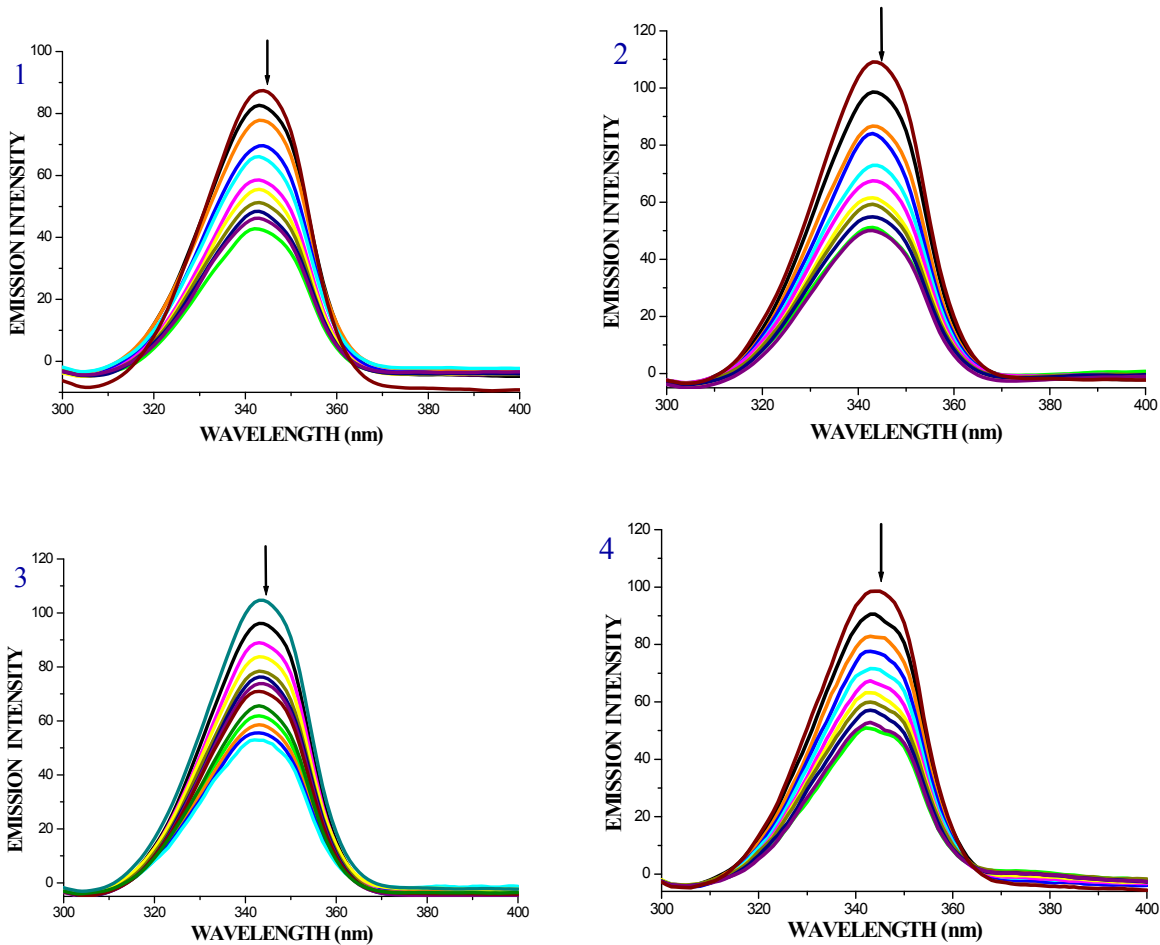

**Fig. S28** Synchronous spectra of HSA (10  $\mu\text{M}$ ) in the presence of increasing amounts of complexes **1-4** (10–100  $\mu\text{M}$ ) for a wavelength difference of  $\Delta\lambda=60$  nm. The arrow shows the emission intensity changes upon increasing concentration of compounds.

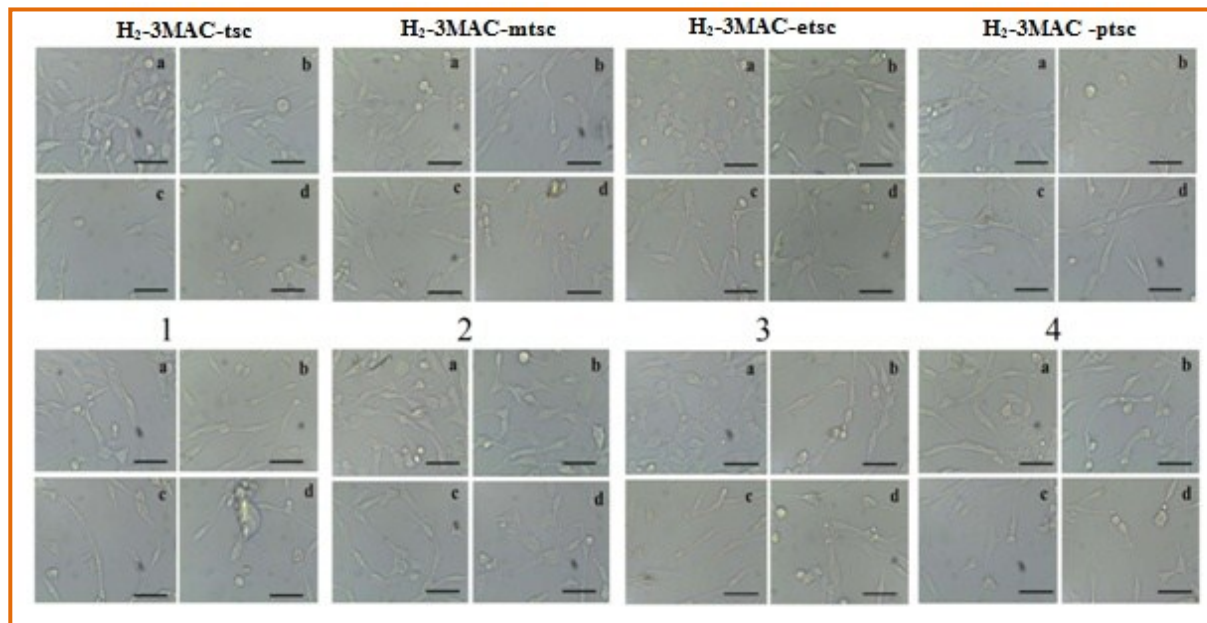

**Fig. S29** Inverted light microscopic imaging: Effect of various concentrations (a - Control; b - 5  $\mu$ M; c - 10  $\mu$ M; d - 20  $\mu$ M) of the ligands [ $H_2$ -3MAC-Rtsc] and complexes **1-4** on the viability of HT-29 cells

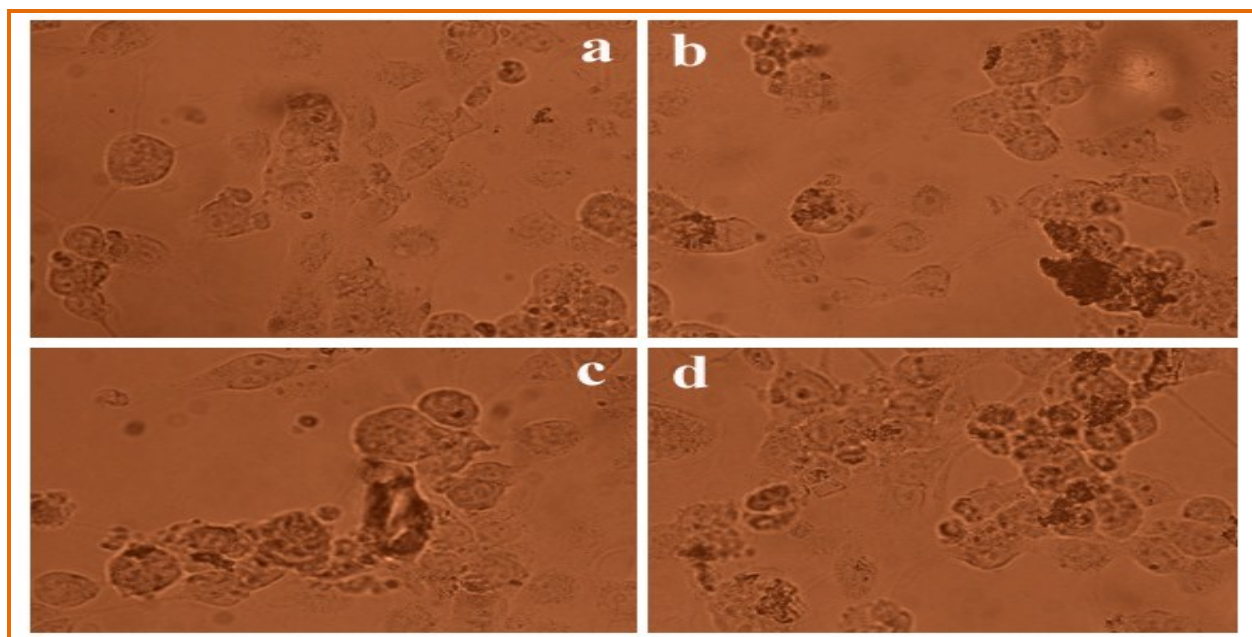

**Fig. S30** Inverted light microscopic imaging: Effect of various concentrations (a - Control; b - 5  $\mu$ M; c - 10  $\mu$ M; d - 20  $\mu$ M) of the positive control *cisplatin* on the viability of HepG2 cells.

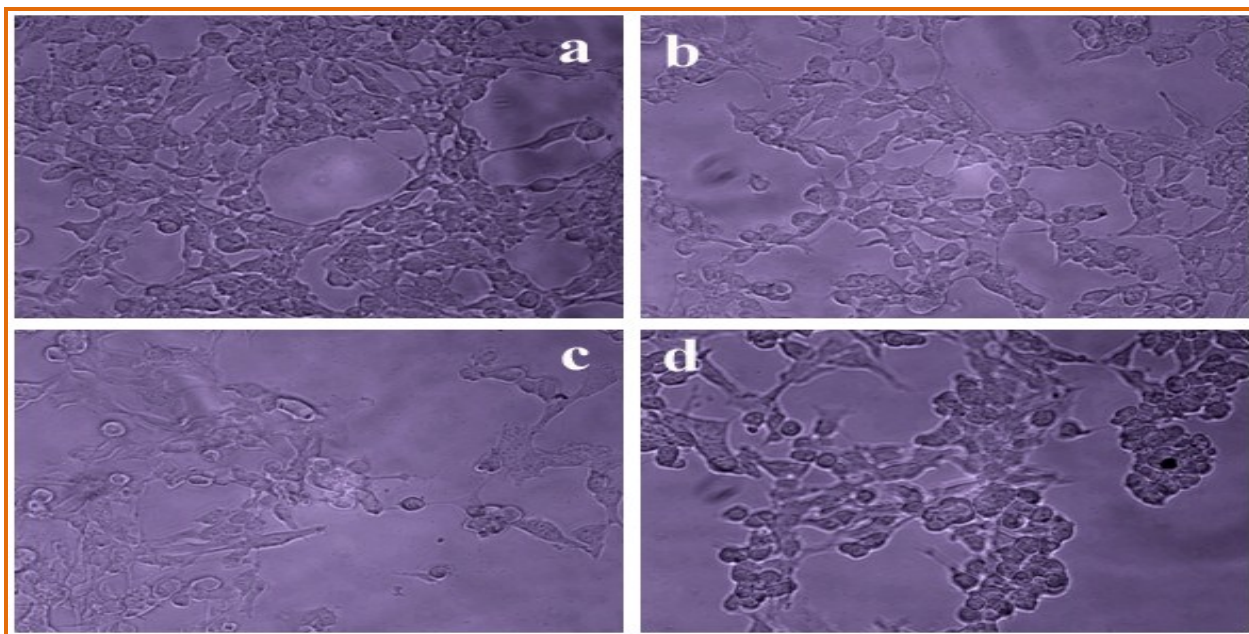

**Fig. S31** Inverted light microscopic imaging: Effect of various concentrations (a - Control; b - 5 μM; c - 10 μM; d - 20 μM) of the positive control *cisplatin* on the viability of HT-29 cells.

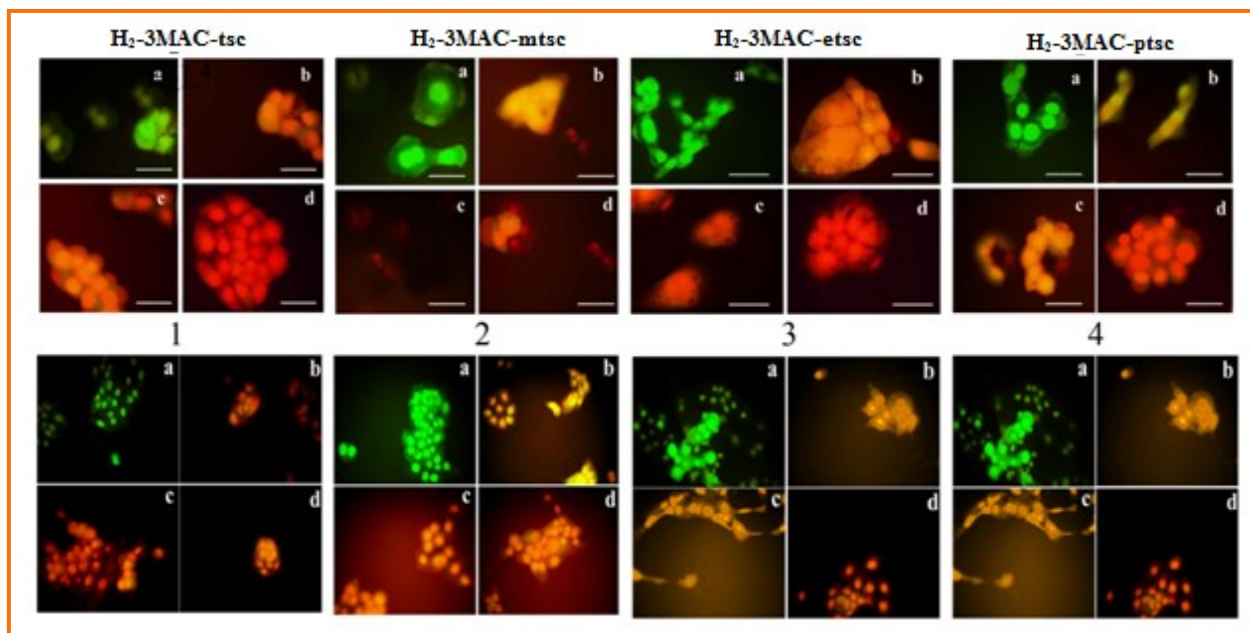

**Fig. S32** AO-EB staining of HT-29 cells treated with various concentrations of the ligands [H<sub>2</sub>-3MAC-Rtsc] and complexes 1-4. (a) Control; (b), (c), (d) After 24 h treatment with 5 μM, 10 μM and 20 μM of the compounds respectively

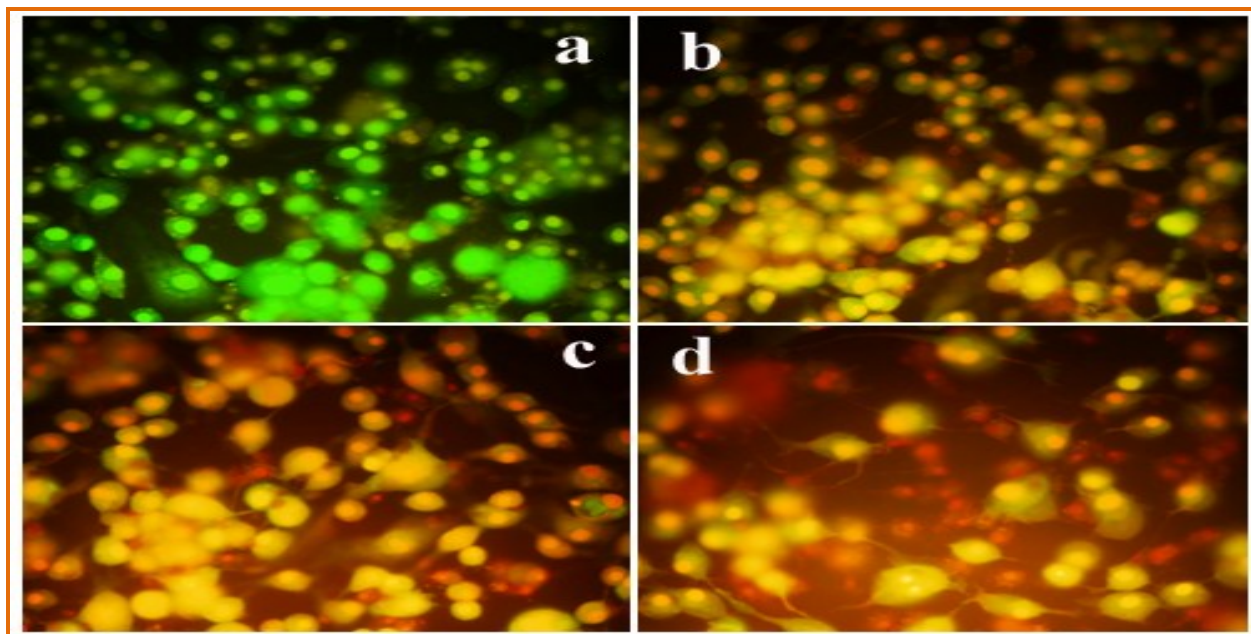

**Fig. S33** AO-EB staining of HepG2 cells treated with various concentrations of the positive control *cisplatin*. (a) Control; (b), (c), (d) After 24 h treatment with 5  $\mu\text{M}$ , 10  $\mu\text{M}$  and 20  $\mu\text{M}$  respectively.

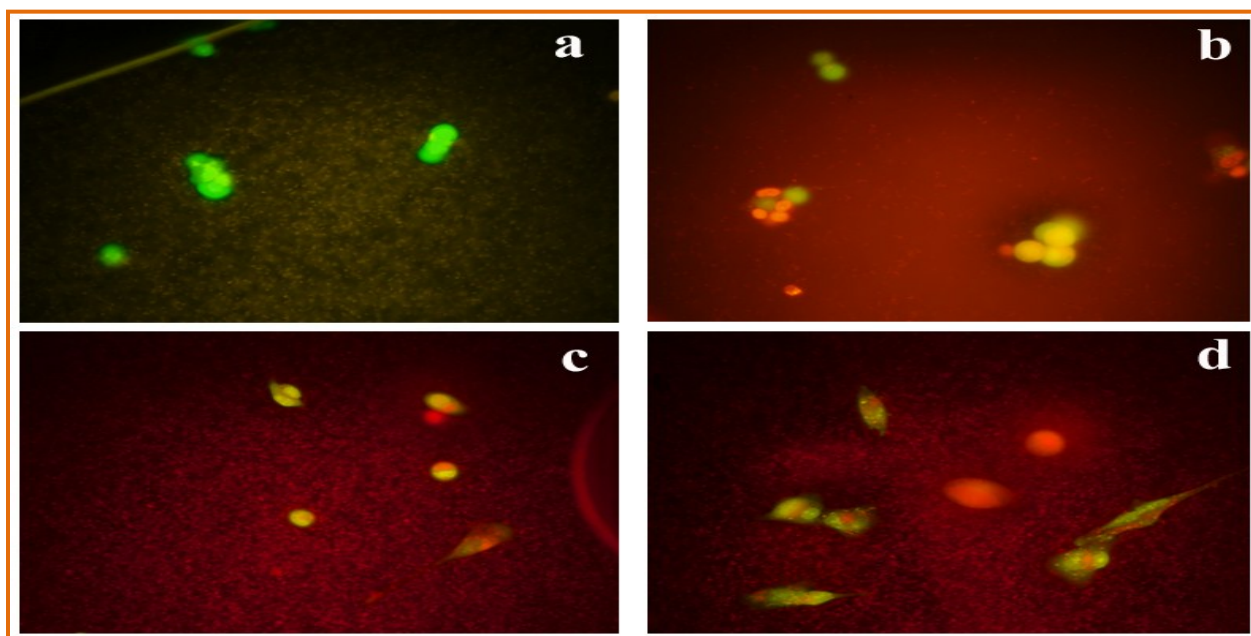

**Fig. S34** AO-EB staining of HT-29 cells treated with various concentrations of the positive control *cisplatin*. (a) Control; (b), (c), (d) After 24 h treatment with 5  $\mu\text{M}$ , 10  $\mu\text{M}$  and 20  $\mu\text{M}$  respectively.

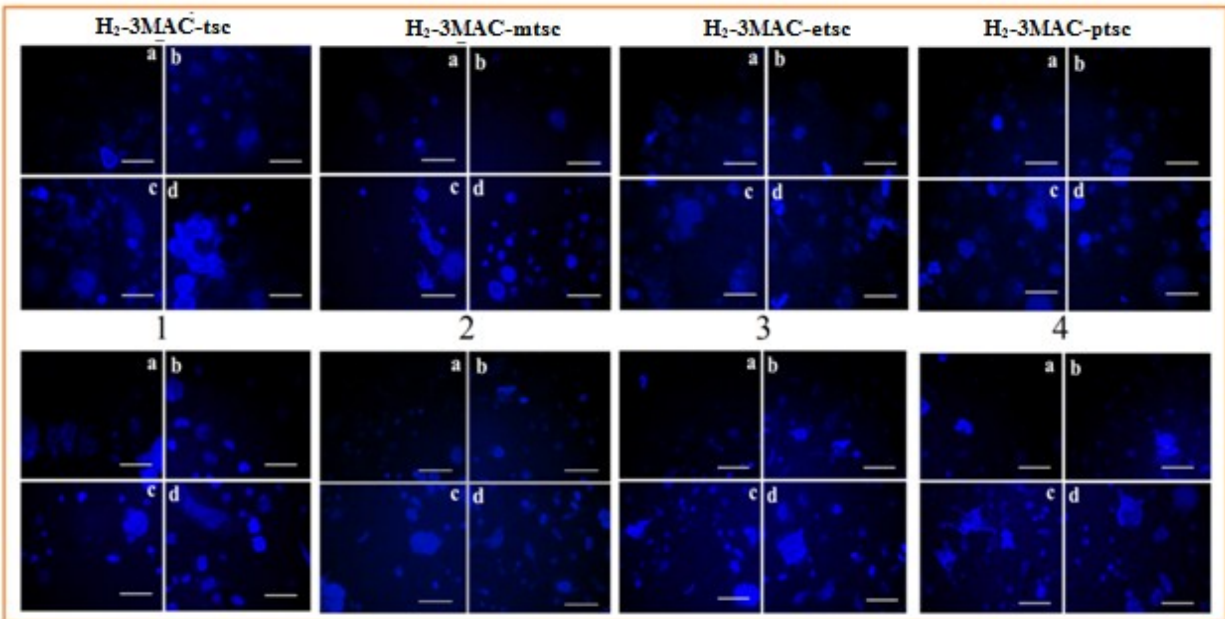

**Fig. S35** Nuclear morphology of HT-29 cells stained with DAPI. HT-29 cells were treated with ligands [ $\text{H}_2\text{-3MAC-Rtsc}$ ] and complexes 1-4 for 24 h and stained with DAPI. (a) Control; (b), (c), (d) After 24 h treatment with 5  $\mu\text{M}$ , 10  $\mu\text{M}$  and 20  $\mu\text{M}$  of the compounds respectively

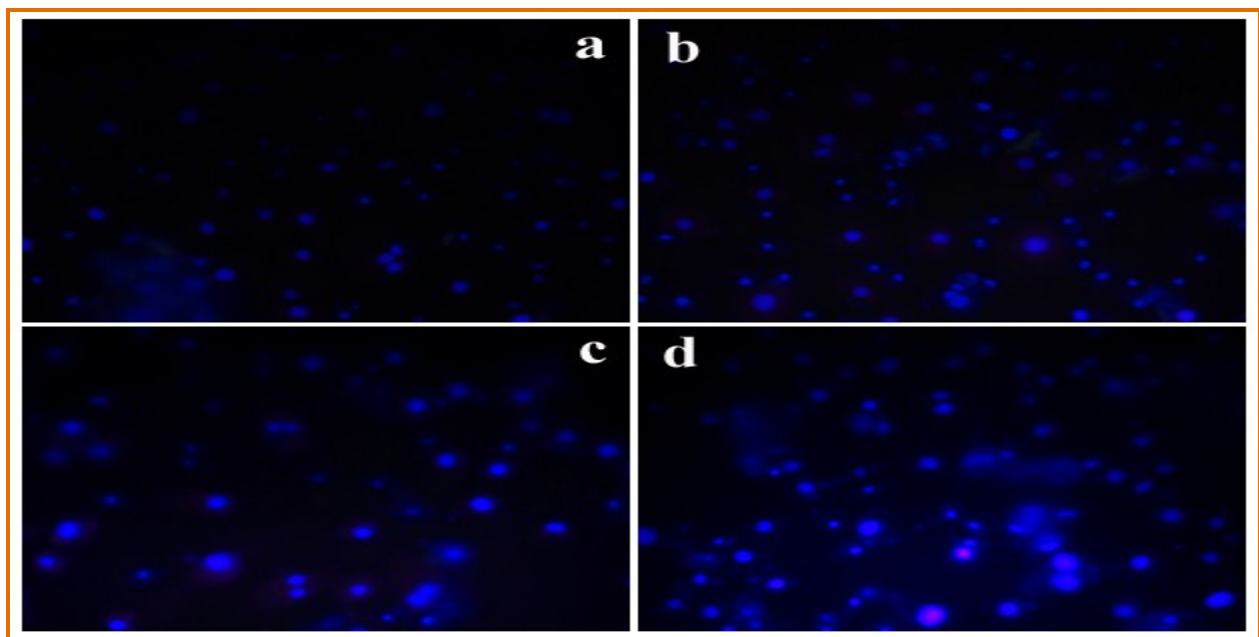

**Fig. S36** Nuclear morphology of HepG2 cells stained with DAPI. HepG2 cells were treated with the positive control *cisplatin* for 24 h and stained with DAPI. (a) Control; (b), (c), (d) After 24 h treatment with 5  $\mu\text{M}$ , 10  $\mu\text{M}$  and 20  $\mu\text{M}$  respectively.



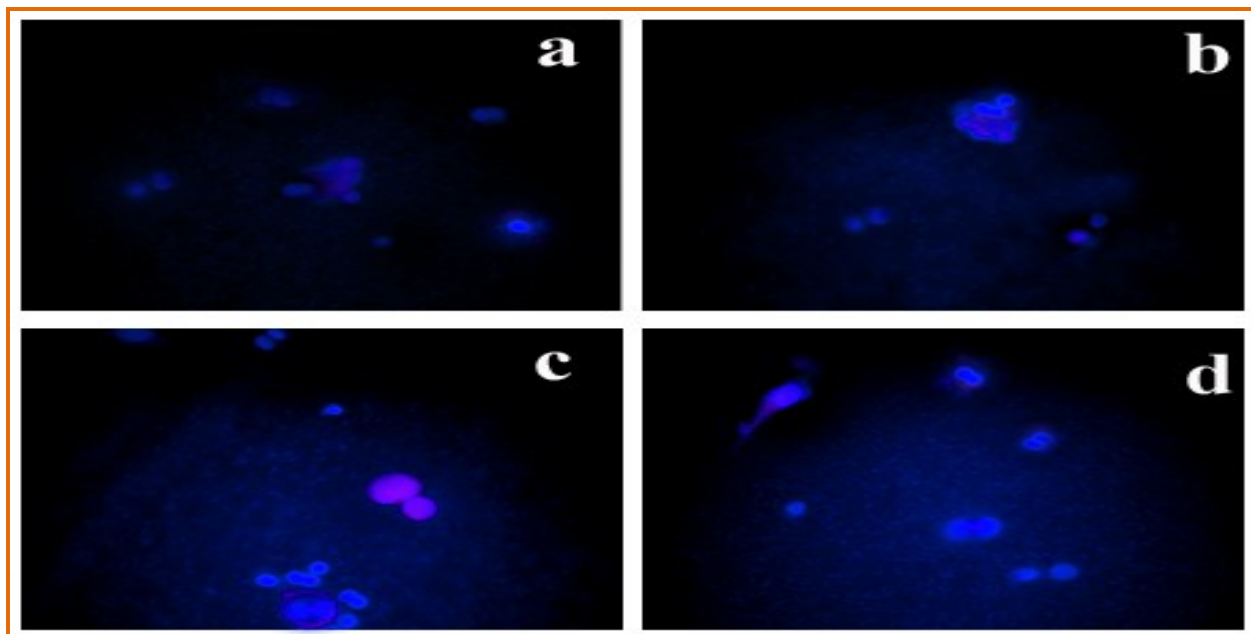

**Fig. S37** Nuclear morphology of HT-29 cells stained with DAPI. HT-29 cells were treated with the positive control *cisplatin* for 24 h and stained with DAPI. (a) Control; (b), (c), (d) After 24 h treatment with 5  $\mu\text{M}$ , 10  $\mu\text{M}$  and 20  $\mu\text{M}$  respectively.

**Table S1** Crystallographic data of the complex **3**

| Identification code                                 | [{Pd(3MAC-etsc)} <sub>4</sub> ] ( <b>3</b> )                                                  |
|-----------------------------------------------------|-----------------------------------------------------------------------------------------------|
| Empirical formula                                   | C <sub>56</sub> H <sub>52</sub> N <sub>12</sub> O <sub>8</sub> Pd <sub>4</sub> S <sub>4</sub> |
| Formula weight                                      | 1574.93                                                                                       |
| Temperature                                         | 100(2) K                                                                                      |
| Wavelength                                          | 0.7107 Å                                                                                      |
| Crystal system                                      | Triclinic                                                                                     |
| Space group                                         | P-1                                                                                           |
| Unit cell dimensions                                |                                                                                               |
| a                                                   | 15.050(16)Å                                                                                   |
| b                                                   | 15.307(16)Å                                                                                   |
| c                                                   | 17.034 (18) Å                                                                                 |
| α                                                   | 96.49(3)°                                                                                     |
| β                                                   | 95.70(3)°                                                                                     |
| γ                                                   | 114.56(2)°                                                                                    |
| Volume                                              | 3499 (6) Å <sup>3</sup>                                                                       |
| Z                                                   | 2                                                                                             |
| Density                                             | 1.495 Mg/m <sup>3</sup>                                                                       |
| Absorption coefficient,                             | 1.185 mm <sup>-1</sup>                                                                        |
| <i>F</i> (000)                                      | 1568                                                                                          |
| θ range for data collection                         | 2.889 to 25.020 °                                                                             |
| Limiting indices                                    | -17 ≤ <i>h</i> ≤ 17,<br>-17 ≤ <i>k</i> ≤ 17,<br>-19 ≤ <i>l</i> ≤ 19                           |
| Reflections collected                               | 35302                                                                                         |
| Independent reflections                             | 11507 ( <i>R</i> (int) = 0.2951)                                                              |
| Absorption correction                               | multi-scan                                                                                    |
| Refinement method                                   | Full-matrix least-squares on <i>F</i> <sup>2</sup>                                            |
| Data / restraints / parameters                      | 11507/ 1333/764                                                                               |
| Goodness-of-fit on <i>F</i> <sup>2</sup>            | 1.018                                                                                         |
| Final <i>R</i> indices [ <i>I</i> > 2σ( <i>I</i> )] | <i>R</i> 1 = 0.1236,<br>w <i>R</i> 2 = 0.2552                                                 |
| <i>R</i> indices (all data)                         | <i>R</i> 1 = 0.2560,<br>w <i>R</i> 2 = 0.3128                                                 |

**Table S2** Selected bond lengths (Å) and bond angles (°) of the complexes (**1-4**)

| <b>BOND LENGTHS</b> |            |                |           |             |           |             |           |
|---------------------|------------|----------------|-----------|-------------|-----------|-------------|-----------|
| <b>1</b>            |            | <b>2</b>       |           | <b>3</b>    |           | <b>4</b>    |           |
| Pd(1)-N(1)          | 2.006(5)   | Pd(1)-N(1)     | 1.998(4)  | Pd(1)-N(1)  | 2.035(16) | Pd(1)-N(1)  | 2.004(1)  |
| Pd(1)-C(1)          | 2.071(6)   | Pd(1)-C(1)     | 2.065(5)  | Pd(1)-C(1)  | 2.095(17) | Pd(1)-O(2)  | 2.045(2)  |
| Pd(1)-S(1)          | 2.349(16)  | Pd(1)-S(1)     | 2.346(1)  | Pd(1)-S(1)  | 2.397(5)  | Pd(1)-S(1)  | 2.2105(7) |
| Pd(1)-S(4)          | 2.352(17)  | Pd(1)-S(4)     | 2.344(1)  | Pd(1)-S(4)  | 2.396(6)  | Pd(1)-Cl(1) | 2.2989(3) |
| Pd(1)-Pd(1)         | 3.203(11)  | Pd(1)-Pd(1)    | 3.172(7)  | Pd(1)-Pd(1) | 3.247(4)  | -           | -         |
| <b>BOND ANGLES</b>  |            |                |           |             |           |             |           |
| <b>1</b>            |            | <b>2</b>       |           | <b>3</b>    |           | <b>4</b>    |           |
| N1-Pd1-C1           | 80.8(2)    | N1-Pd1-C1      | 80.9(2)   | N1-Pd1-C1   | 80.8(7)   | N1-Pd1-Cl1  | 177.02(5) |
| N1-Pd1-S1           | 82.46(15)  | N1-Pd1-S1      | 82.9(1)   | N1-Pd1-S1   | 83.7(4)   | Cl1-Pd1-S1  | 90.88(2)  |
| C1-Pd1-S1           | 162.19(19) | C1-Pd1-S1      | 161.6(1)  | C1-Pd1-S1   | 163.8(6)  | Cl1-Pd1-O2  | 89.09(4)  |
| N1-Pd1-S1#1         | 174.96(15) | N1-Pd1-S1#1    | 174.4(1)  | N1-Pd1-Pd2  | 94.93(5)  | S1-Pd1-O2   | 179.39(4) |
| C1-Pd1-S1#1         | 104.23(19) | C1-Pd1-S1#1    | 104.6(1)  | C1-Pd1-S4   | 104.9(6)  | S1-Pd1-N1   | 86.73(5)  |
| S1-Pd1-S1#1         | 92.51(4)   | S1-Pd1-S1#1    | 91.95(5)  | N1-Pd1-S4   | 173.2(5)  | O2-Pd1-N1   | 93.29(6)  |
| N1-Pd1-Pd1#2        | 90.43(15)  | N1-Pd1-Pd1#2   | 88.9(1)   | N1-Pd1-Pd2  | 121.6(1)  | Pd1-N1-N2   | 118.5(1)  |
| C1-Pd1-Pd1#2        | 91.49(16)  | C1-Pd1-Pd1#2   | 93.1(1)   | C1-Pd1-Pd2  | 86.0(5)   | N1-Pd1-Cl1  | 177.02(5) |
| S1-Pd1-Pd1#2        | 94.66(4)   | S1-Pd1-Pd1#2   | 95.12(4)  | S1-Pd1-Pd2  | 100.2(1)  | Cl1-Pd1-S1  | 90.88(2)  |
| S1#1-Pd1-Pd1#2      | 89.76(4)   | S1#1-Pd1-Pd1#2 | 89.38(4)  | S4-Pd2-Pd1  | 89.93(1)  | Cl1-Pd1-O2  | 89.09(4)  |
| C11-S1-Pd1          | 95.2(2)    | C11-S1-Pd1     | 94.3(2)   | S1-Pd1-S4   | 90.2(2)   | S1-Pd1-O2   | 179.39(4) |
| C11-S1-Pd1#3        | 105.5(2)   | C11-S1-Pd1#3   | 103.0(2)  | C15-Pd2-Pd1 | 94.3(6)   | S1-Pd1-N1   | 86.73(5)  |
| Pd1-S1-Pd1#3        | 114.46(7)  | Pd1-S1-Pd1#3   | 114.54(6) | N4-Pd2-S3   | 173.8(4)  |             |           |
| N1-Pd1-C1           | 80.8(2)    | N1-Pd1-C1      | 80.9(2)   | N4-Pd2-C15  | 79.3(8)   |             |           |
| N1-Pd1-S1           | 82.46(15)  | N1-Pd1-S1      | 82.9(1)   | N4-Pd2-S2   | 85.0(4)   |             |           |
| C1-Pd1-S1           | 162.19(19) | C1-Pd1-S1      | 161.6(1)  | C15-Pd2-S2  | 163.6(1)  |             |           |
| N1-Pd1-S1#1         | 174.96(15) | N1-Pd1-S1#1    | 174.4(1)  | C29-Pd3-N7  | 80.9(8)   |             |           |
| C1-Pd1-S1#1         | 104.23(19) | C1-Pd1-S1#1    | 104.6(1)  | N7-Pd3-S1   | 173.9(5)  |             |           |
| S1-Pd1-S1#1         | 92.51(4)   | S1-Pd1-S1#1    | 91.95(5)  | S1-Pd3-S3   | 92.0(2)   |             |           |
| N1-Pd1-Pd1#2        | 90.43(15)  | N1-Pd1-Pd1#2   | 88.9(1)   | C43-Pd4-N10 | 82.0(8)   |             |           |
| C1-Pd1-Pd1#2        | 91.49(16)  | C1-Pd1-Pd1#2   | 93.1(1)   | N10-Pd4-S2  | 172.7(4)  |             |           |
| S1-Pd1-Pd1#2        | 94.66(4)   | S1-Pd1-Pd1#2   | 95.12(4)  | N10-Pd4-S4  | 81.4(4)   |             |           |
| S1#1-Pd1-d1#2       | 89.76(4)   | S1#1-Pd1-Pd1#2 | 89.38(4)  | S1-Pd1-Pd3  | 110.9(2)  |             |           |
| C11-S1-Pd1          | 95.2(2)    | C11-S1-Pd1     | 94.3(2)   | Pd2-S3-Pd3  | 112.7(2)  |             |           |
| C11-S1-Pd1#3        | 105.5(2)   | C11-S1-Pd1#3   | 103.0(2)  | Pd2-S2-Pd4  | 93.8(2)   |             |           |
| Pd1-S1-Pd1#3        | 114.46(7)  | Pd1-S1-Pd1#3   | 114.54(6) | Pd1-S1-Pd4  | 112.2(2)  |             |           |

**Table S3** Hydrogen bonds for complexes **1-4** [ $\text{\AA}$  and  $^\circ$ ]

| D–H...A                                                                                                                                                                                                                                                                                                                                                                                                 | d(D–H)  | d(H...A) | d(D...A)  | $\angle(\text{DHA})$ |
|---------------------------------------------------------------------------------------------------------------------------------------------------------------------------------------------------------------------------------------------------------------------------------------------------------------------------------------------------------------------------------------------------------|---------|----------|-----------|----------------------|
| [ $\{\text{Pd}(\text{3MAC-tsc})\}_4$ ] ( <b>1</b> )                                                                                                                                                                                                                                                                                                                                                     |         |          |           |                      |
| C2B-H2B1...O1A#4                                                                                                                                                                                                                                                                                                                                                                                        | 0.98    | 2.39     | 3.28(2)   | 151.1                |
| C2B-H2B2...N2                                                                                                                                                                                                                                                                                                                                                                                           | 0.98    | 2.58     | 3.531(17) | 164.8                |
| N3-H3NA...O1B                                                                                                                                                                                                                                                                                                                                                                                           | 0.82(7) | 2.12(9)  | 2.94(5)   | 177(7)               |
| N3-H3NA...O1B#5                                                                                                                                                                                                                                                                                                                                                                                         | 0.82(7) | 2.33(8)  | 3.15(4)   | 172(6)               |
| N3-H3NB...O2#6                                                                                                                                                                                                                                                                                                                                                                                          | 0.84(9) | 2.14(9)  | 2.971(8)  | 172(8)               |
| Symmetry operation: $(y+1/4, -x+3/4, -z+3/4)$ ; $(-x+1, -y+1/2, z+0)$ ; $(-y+3/4, x-1/4, -z+3/4)$ ; $(-x+1, -y+1, -z+1)$ ; $(-x+0, -y+1/2, z+0)$ ; $(y-1/4, -x+3/4, z-1/4)$                                                                                                                                                                                                                             |         |          |           |                      |
| [ $\{\text{Pd}(\text{3MAC-mtsc})\}_4$ ] ( <b>2</b> )                                                                                                                                                                                                                                                                                                                                                    |         |          |           |                      |
| N(3)-H...O(2)                                                                                                                                                                                                                                                                                                                                                                                           | 0.880   | 2.09(7)  | 2.891(6)  | 149.4                |
| Symmetry operation: $(x, y, z)$ ; $(1/2-x, -y, 1/2+y)$ ; $(3/4-y, 1/4+x, 1/4+z)$ ; $(3/4+y, 3/4-x, 3/4+z)$ ; $(1/2+x, 1/2+y, 1/2+z)$ ; $(-x, 1/2-y, z)$ ; $(1/4-y, 3/4+x, 3/4+z)$ ; $(1/4+y, 1/4-x, 1/4+z)$ ; $(-x, -y, -z)$ ; $(1/2+x, y, 1/2-z)$ ; $(1/4+y, 3/4-x, 3/4-z)$ ; $(1/4-y, 1/4+x, 1/4-z)$ ; $(1/2-x, 1/2-y, 1/2-z)$ ; $(x, 1/2+y, -z)$ ; $(3/4+y, 1/4-x, 1/4-z)$ ; $(3/4-y, 3/4+x, 3/4-z)$ |         |          |           |                      |
| [ $\{\text{Pd}(\text{3MAC-etsc})\}_4$ ] ( <b>3</b> )                                                                                                                                                                                                                                                                                                                                                    |         |          |           |                      |
| N(12)-H(12)...O(2)                                                                                                                                                                                                                                                                                                                                                                                      | 0.880   | 2.059    | 2.922     | 9.64                 |
| N(6)-H(6)...O(8)                                                                                                                                                                                                                                                                                                                                                                                        | 0.880   | 2.184    | 2.848     | 34.71                |
| Symmetry operation: $(x, y, z)$ ; $(-x, -y, -z)$                                                                                                                                                                                                                                                                                                                                                        |         |          |           |                      |
| [Pd(H-3MAC-ptsc)Cl] ( <b>4</b> )                                                                                                                                                                                                                                                                                                                                                                        |         |          |           |                      |
| N(3)-H(3)...O(3)                                                                                                                                                                                                                                                                                                                                                                                        | 0.820   | 2.040    | 2.858     | 174.56               |
| Symmetry operation: $(x, y, z)$ ; $(1/2-x, 1/2+y, 1/2-z)$ ; $(1/2+x, 1/2-y, 1/2+z)$ ; $(-x, -y, -z)$                                                                                                                                                                                                                                                                                                    |         |          |           |                      |

**Table S4** Three-dimensional fluorescence spectral characteristics of BSA/HSA and BSA/HSA-Complexes systems

| Compounds                        | Rayleigh scattering peaks                               |                             |               | Fluorescence peaks                                      |                             |               |
|----------------------------------|---------------------------------------------------------|-----------------------------|---------------|---------------------------------------------------------|-----------------------------|---------------|
|                                  | Peak position<br>$\lambda_{ex}/\lambda_{em}$<br>(nm/nm) | Stokes $\Delta\lambda$ (nm) | Intensity (F) | Peak position<br>$\lambda_{ex}/\lambda_{em}$<br>(nm/nm) | Stokes $\Delta\lambda$ (nm) | Intensity (F) |
| <b>BSA</b>                       |                                                         |                             |               |                                                         |                             |               |
| BSA                              | 280/280                                                 | 0                           | 637.73        | 280/343                                                 | 63                          | 514.37        |
| BSA+ [H <sub>2</sub> -3MAC-tsc]  | 280/280                                                 | 0                           | 710.98        | 280/341                                                 | 61                          | 498.91        |
| BSA+ [H <sub>2</sub> -3MAC-mtsc] | 280/280                                                 | 0                           | 669.64        | 280/341                                                 | 61                          | 457.95        |
| BSA+ [H <sub>2</sub> -3MAC-etsc] | 280/280                                                 | 0                           | 661.26        | 280/342                                                 | 62                          | 429.53        |
| BSA+ [H <sub>2</sub> -3MAC-ptsc] | 280/280                                                 | 0                           | 747.76        | 280/344                                                 | 64                          | 471.34        |
| BSA+1                            | 280/280                                                 | 0                           | 775.35        | 280/339                                                 | 59                          | 390.79        |
| BSA+2                            | 280/280                                                 | 0                           | 736.92        | 280/339                                                 | 59                          | 355.05        |
| BSA+3                            | 280/280                                                 | 0                           | 714.87        | 280/337                                                 | 57                          | 276.44        |
| BSA+4                            | 280/280                                                 | 0                           | 707.34        | 280/348                                                 | 68                          | 494.69        |
| <b>HSA</b>                       |                                                         |                             |               |                                                         |                             |               |
| HSA                              | 280/280                                                 | 0                           | 480.02        | 280/333                                                 | 53                          | 289.67        |
| HSA+ [H <sub>2</sub> -3MAC-tsc]  | 280/280                                                 | 0                           | 493.18        | 280/333                                                 | 53                          | 242.36        |
| HSA+ [H <sub>2</sub> -3MAC-mtsc] | 280/280                                                 | 0                           | 491.98        | 280/337                                                 | 57                          | 279.19        |
| HSA+ [H <sub>2</sub> -3MAC-etsc] | 280/280                                                 | 0                           | 549.64        | 280/333                                                 | 53                          | 254.76        |
| HSA+ [H <sub>2</sub> -3MAC-ptsc] | 280/280                                                 | 0                           | 550.23        | 280/333                                                 | 53                          | 264.30        |
| HSA+1                            | 280/280                                                 | 0                           | 633.52        | 280/334                                                 | 54                          | 261.04        |
| HSA+2                            | 280/280                                                 | 0                           | 613.07        | 280/332                                                 | 52                          | 263.30        |
| HSA+3                            | 280/280                                                 | 0                           | 782.63        | 280/327                                                 | 47                          | 255.36        |
| HSA+4                            | 280/280                                                 | 0                           | 697.72        | 280/330                                                 | 50                          | 269.07        |
